# Supplementary material for: Sex-specific trends in 4-year survival in 37 276 men and women with acute myocardial infarction before the age of 55 years in Sweden, 1987–2006: a register-based cohort study
Source: PubMed Central journal article supplement — BMJ Open. 2014 May 2;4(5):e004598. doi: 10.1136/bmjopen-2013-004598 (PMC4025457; doi:10.1136/bmjopen-2013-004598), 2014-05-02
Supplement: bmjopen-2013-004598.draft_revisions.pdf [file bmjopen-2013-004598.draft_revisions.pdf]

# BMJ Open

## Sex-specific trends in survival in 37,276 men and women with acute myocardial infarction before the age of 55 years in Sweden, 1987–2006. Prospective cohort study.

|                                 |                                                                                                                                                                                                                                                                                                                                                                                                                                                                                                                                                                                                                                                                                                               |
|---------------------------------|---------------------------------------------------------------------------------------------------------------------------------------------------------------------------------------------------------------------------------------------------------------------------------------------------------------------------------------------------------------------------------------------------------------------------------------------------------------------------------------------------------------------------------------------------------------------------------------------------------------------------------------------------------------------------------------------------------------|
| Journal:                        | <i>BMJ Open</i>                                                                                                                                                                                                                                                                                                                                                                                                                                                                                                                                                                                                                                                                                               |
| Manuscript ID:                  | bmjopen-2013-004598                                                                                                                                                                                                                                                                                                                                                                                                                                                                                                                                                                                                                                                                                           |
| Article Type:                   | Research                                                                                                                                                                                                                                                                                                                                                                                                                                                                                                                                                                                                                                                                                                      |
| Date Submitted by the Author:   | 02-Dec-2013                                                                                                                                                                                                                                                                                                                                                                                                                                                                                                                                                                                                                                                                                                   |
| Complete List of Authors:       | Nielsen, Susanne; Institute of medicine, Department of Molecular and Clinical Medicin<br>Björck, Lena; Department of Molecular and Clinical Medicine, Sahlgrenska Academy<br>Berg, Johanna; Department of Molecular and Clinical Medicine, Sahlgrenska Academy<br>Giang, Kok Wai; Department of Molecular and Clinical Medicine, Sahlgrenska Academy<br>Zverkova-Sandström, Tatiana; Department of Molecular and Clinical Medicine, Sahlgrenska Academy<br>Falk, Kristin; Institute of Health and Care Sciences, Sahlgrenska Academy,<br>Määttä, Sylvia; Institute of Health and Care Sciences, Sahlgrenska Academy,<br>Rosengren, Annika; Department of Molecular and Clinical Medicine, Sahlgrenska Academy |
| <b>Primary Subject Heading</b>: | Cardiovascular medicine                                                                                                                                                                                                                                                                                                                                                                                                                                                                                                                                                                                                                                                                                       |
| Secondary Subject Heading:      | Cardiovascular medicine                                                                                                                                                                                                                                                                                                                                                                                                                                                                                                                                                                                                                                                                                       |
| Keywords:                       | Epidemiology < TROPICAL MEDICINE, Coronary heart disease < CARDIOLOGY, Myocardial infarction < CARDIOLOGY                                                                                                                                                                                                                                                                                                                                                                                                                                                                                                                                                                                                     |
|                                 |                                                                                                                                                                                                                                                                                                                                                                                                                                                                                                                                                                                                                                                                                                               |

SCHOLARONE™  
Manuscripts

1  
2  
3 **Sex-specific trends in survival in 37,276 men and women with acute**  
4 **myocardial infarction before the age of 55 years in Sweden, 1987–2006.**  
5  
6

7  
8 **Prospective cohort study.**  
9

10  
11  
12  
13  
14 Nielsen S, MSc<sup>1</sup>, Björck L, PhD<sup>1,2</sup>, Berg J, MD<sup>1</sup>, Giang KW, MSc<sup>1</sup>, Zverkova Sandström T,  
15 BSc<sup>1</sup>, Falk K, PhD<sup>2</sup>, Määttä S, PhD<sup>2</sup>, Rosengren A, MD, PhD<sup>1\*</sup>  
16  
17

18  
19  
20 <sup>1</sup>Department of Molecular and Clinical Medicine and <sup>2</sup>Institute of Health and Care Sciences,  
21 Sahlgrenska Academy, University of Gothenburg, Gothenburg, Sweden  
22  
23

24  
25  
26  
27 \*Corresponding author: Annika Rosengren, Department of Molecular and Clinical Medicine,  
28 Sahlgrenska University, Hospital/Östra sjukhuset, SE-41685, Gothenburg, Sweden. E-mail:  
29 annika.rosengren@gu.se; Tel: +46 31343 4086; Fax: +46 31258933  
30  
31  
32  
33  
34  
35  
36  
37

38 **Keywords** Myocardial Infarction • Mortality • Survival • Trends • Epidemiology  
39  
40  
41  
42

43  
44 **Word count:** Abstract: 265  
45

46  
47 Manuscript: 2972  
48  
49  
50  
51  
52  
53  
54  
55  
56  
57  
58  
59  
60

## ABSTRACT

**Objective** To examine sex-specific trends in 4-year mortality among young patients with a first acute myocardial infarction (AMI), 1987–2006.

**Design:** Prospective cohort study

**Setting:** Sweden.

**Participants:** We identified 37,276 patients (19.4% women; age, 25–54 years) from the Swedish Inpatient Register, 1987–2006, who had survived 28 days after an AMI.

**Outcome measures:** Four-year mortality from all causes, and Standard Mortality Ratio (SMR)

**Results** From the first to last 5-year period, the absolute excess risk decreased from 1.38 to 0.50 and 1.53 to 0.59 per 100 person-years among men aged 25–44 and 45–54 years, respectively. Corresponding figures for women were a decrease from 2.26 to 1.17 and from 1.93 to 1.45 per 100 person-years, respectively. Trends for women were non-linear, decreasing to the same extent as those for men until the third period, then increasing. For the last 5-year period, the standardized mortality ratio for young survivors of AMI compared with the general population was 4.34 (95% confidence interval [CI]: 3.04–5.87) and 2.43 (95% CI: 2.12–2.76) for men aged 25–44 and 45–54 years, respectively, and 13.53 (95% CI: 8.36–19.93) and 6.42 (95% CI: 5.24–7.73) for women. Deaths not associated with cardiovascular causes increased from 21.5% to 44.6% in men and 41.5% to 65.9% in women, respectively.

**Conclusion** Young male survivors of AMI have low absolute long-term mortality rates, but these rates remain 2- to 4-fold that of the general population. After favourable development until 2001, women now have higher absolute mortality than men and a 6- to 14-fold risk of death compared with healthy women.

**Strengths and limitations of this study**

- Population-based study, that includes all patients with a first AMI, aged 25-55 years, in Sweden during a period of twenty years.
- Strengths include nationwide coverage, and near-complete follow-up.
- The main limitation is that the used register does not provide data covering clinical characteristics or treatment which could have been valuable to estimate their impact on mortality.

## INTRODUCTION

Survival after acute myocardial infarction (AMI) has improved during the last several decades in Sweden and elsewhere.<sup>1-3</sup> Nonetheless, coronary heart disease (CHD) remains a major contributor to morbidity and mortality with more than one in five men and women currently dying from CHD in Europe.<sup>4,5</sup> Survivors of AMI are known to have an impaired prognosis compared with the general population.<sup>6</sup> In a recent UK study, the risk of death of any cause among survivors of a first AMI was twice that of the general English population of equivalent age.<sup>7</sup>

Most patients with AMI are elderly; accordingly, most information on long-term survival is based on patients older than 55 years. However, about one in six AMI survivors is younger than 55 years.<sup>8</sup> Knowledge of the prognosis among young patients with AMI is essential because younger patients stand to lose more of their remaining life years compared with older patients. This applies particularly to women because women have a longer life expectancy.

Further, younger, but not older, women hospitalized with AMI have a worse long-term prognosis than men.<sup>9,10</sup> However, there have since been marked changes in treatment, diagnostic criteria, and post-AMI prognosis. A recent study found that reductions in long-term mortality after 1985 were at least as high for women as for men with AMI,<sup>11</sup> but the study did not specifically report findings for young patients. An additional study, found that reductions in mortality were similar regardless of age but that younger patients are more likely to receive evidence based care.<sup>12</sup>

1  
2  
3 Few data sets contain a sufficient number of young patients to reliably estimate risk of death  
4 compared with the general population. In addition, more information is needed about cause-  
5 specific mortality, because an unknown proportion of deaths may not be due to cardiovascular  
6 causes, and will thus be less amenable to coronary preventive measures. In the present study,  
7 we examined sex-specific trends in long-term survival in a register-based cohort of patients  
8 aged 24–54 years hospitalized with a first AMI during 1987–2006, and compared death rates  
9 for men and women separately with those of the general population.  
10  
11  
12  
13  
14  
15  
16  
17  
18  
19

## 20 21 **METHODS**

### 22 23 **Registers and study population**

24  
25 Sweden has a publicly financed health care system, with some health care facilities privately  
26 run but still fully integrated into the health care system. The Swedish National Inpatient  
27 Register (IPR), has established complete national coverage since 1987. Positive predictive  
28 values differ among diagnoses in the IPR, but is generally 85–95%.<sup>13</sup> Diagnoses in the IPR  
29 are coded according to the Swedish *International Classification of Diseases* (ICD) system  
30 (ICD 8th revision until 1986, 9th revision until 1996, and 10th revision thereafter). In the  
31 present study, data from the IPR and the Swedish Cause of Death Registries were linked  
32 through personal identity numbers unique to each Swedish citizen. The Swedish Cause of  
33 Deaths Registries is based on diagnoses from deaths certificates and captures 99,2% of all  
34 deaths.<sup>14</sup>  
35  
36  
37  
38  
39  
40  
41  
42  
43  
44  
45  
46  
47  
48  
49

50 The present study included all 38,813 patients in Sweden aged 25–54 years and hospitalized  
51 with a first AMI in 1987–2006; AMI was defined as a principal discharge code according to  
52 the ICD-9: 410 (until 1996) and ICD-10: I21 (from 1997 onward). After excluding 1,537  
53 patients who died during the first 28 days, 37,276 patients (7,229 women and 30,047 men)  
54  
55  
56  
57  
58  
59  
60

1  
2  
3 with a first AMI remained for analysis. Data from 1980 onward were used to identify first  
4  
5 AMIs only, with a time frame of 7 years throughout, to ensure that AMIs registered each year  
6  
7 had the same chance of being identified as a first AMI. Criteria for a diagnosis of AMI in  
8  
9 Sweden have followed established guidelines, changing after the adoption of new AMI  
10  
11 criteria in the year 2000.<sup>15,16</sup> Thus, the characteristics of the AMIs in our analysis changed  
12  
13 during the study period. Use of troponins became standard after the year 2000.  
14  
15

16  
17  
18 Comorbidities were defined by the following main or contributory discharge codes during the  
19  
20 preceding 7 years, including the index hospitalization: diabetes (ICD-9 250; ICD-10 E10–  
21  
22 E14), hypertension (ICD-9 401–405; ICD-10: I10–I15), valvular disease (ICD-9 394–397,  
23  
24 424; ICD-10 I05–I09, I34–I35), congenital heart disease (ICD-9 745–747; ICD-10 Q20–  
25  
26 Q26), stroke (ICD-9 431–434, 436; ICD-10 I61–I64), chronic respiratory disease (ICD-9  
27  
28 490–496; ICD-10 J40–J47), malignancy (ICD-9 140–208; ICD-10 C00–C97), renal failure  
29  
30 (ICD-9 584–586; ICD-10 N17–N19), coronary artery bypass grafting (3067, 3066, 3105,  
31  
32 3127, FNA, FNB, FNE, FNC), and percutaneous coronary intervention (3080, FNG 00, FNG  
33  
34 02, FNG 05).  
35  
36  
37  
38  
39

#### 40 **Follow-up**

41  
42 We analysed 4-year all-cause mortality for four 5-year periods (1987–1991, 1992–1996,  
43  
44 1997–2001, and 2002–2006) through the Swedish Cause of Death Registries. The following  
45  
46 codes were used for assignment of causes of death among fatal cases: CVD, (390–459, I00–  
47  
48 I99), ischaemic heart disease (IHD) (410–414, I20–I25, stroke (430–438, I60–I68), and all  
49  
50 other causes (including malignancies; 140-208, C00-C97).  
51  
52  
53  
54  
55

#### 56 **Statistical analysis**

57  
58  
59  
60

1  
2  
3 Statistical analyses were performed with SAS 9.3, (R version 2.15.1 to obtain the graphs). For  
4  
5 comorbidities,  $\chi^2$  tests were used to evaluate differences between men and women and for  
6  
7 trends; a P-value of  $\leq 0.05$  was considered significant. To compare mean age within the  
8  
9 respective age groups, t-tests were performed.  
10

11  
12  
13  
14 Standardized mortality ratios (SMR) with 95% confidence intervals (CIs) were calculated as  
15  
16 the ratio of the observed to expected number of deaths, estimated from rates in the general  
17  
18 Swedish population, by age, gender, and calendar year, using life expectancy tables from  
19  
20 Official Statistics of Sweden (SCB).  
21

22  
23  
24  
25 Absolute excess risk (AER) was estimated and defined as the absolute difference between  
26  
27 observed and expected mortality among all patients. The difference between observed and  
28  
29 expected deaths, divided by the number of person-years at risk and multiplied by 100, was  
30  
31 calculated to derive the AER. The AER calculations add a useful measure of excess risk in  
32  
33 absolute terms.  
34  
35

36  
37  
38 Cox proportional hazard regression, providing hazard ratios (HR) with 95% CIs, was used to  
39  
40 estimate age, and gender-specific changes in all-cause mortality over time.<sup>17</sup> The first period  
41  
42 (1987–1991) was used as reference; The multivariate models were adjusted for age, diabetes,  
43  
44 hypertension, valvular and congenital heart disease, stroke, chronic respiratory disease,  
45  
46 malignancy and renal failure. Furthermore, in the final model the periods were also tested for  
47  
48 proportionality by interactions of age, time and with significant comorbidities only (men 45-  
49  
50 54; malignancies, women, 45-54; chronic respiratory disease).  
51  
52  
53  
54  
55  
56  
57  
58  
59  
60



The Kaplan-Meier method was used to estimate the survival probability. The proportionality assumption of Cox regression was tested by including interactions between covariates (age, sex, and period) with time; neither interaction test was statistically significant.<sup>18</sup> A log-rank test was conducted to study changes in survival between the time periods.

## RESULTS

Of the 37,276 patients in the study, 7,905 (21.2%) were aged 25–44 years (19.6% women) and 29,371 (78.8%) were aged 44–54 years (19.3% women). Other than diabetes and hypertension (11% for both), this population had few diagnosed comorbidities (Table 1). Women had more diabetes, hypertension, chronic lower respiratory disease and malignancies than did men ( $P < 0.0001$ ).

**Table 1. Baseline characteristics in 37,276 men and women aged <55 years with a first AMI, 1987–2006**

|                                | All          | Men           | Women        | P-value |
|--------------------------------|--------------|---------------|--------------|---------|
| <b>Number of patients</b>      | 37 276       | 30 047        | 7 229        |         |
| <b>Age 25-44, n (%)</b>        | 7 905 (21.2) | 6 357 (21.2)  | 1 548 (21.4) |         |
| <b>Mean age (SD)</b>           |              | 40.21 (3.74)  | 39.84 (4.04) | 0.055   |
| <b>Age 44-54, n (%)</b>        | 29 371(78.8) | 23 690 (78.8) | 5 681 (78.6) |         |
| <b>Mean age (SD)</b>           |              | 50.31 (2.75)  | 50.39 (2.76) | 0.0549  |
| <b>Diabetes, n (%)</b>         | 4 064 (10.9) | 3 017 (10.0)  | 1 047 (14.5) | <0.0001 |
| <b>Hypertension, n (%)</b>     | 4110 (11.0)  | 3141 (10.6)   | 969 (13.4)   | <0.0001 |
| <b>Valvular disease, n (%)</b> | 287 (0.77)   | 211 (0.70)    | 76 (1.05)    | 0.0023  |

|                                                 |            |            |            |         |
|-------------------------------------------------|------------|------------|------------|---------|
| <b>Congenital heart disease</b>                 | 36 (0.10)  | 23 (0.08)  | 13 (0.18)  | 0.0111  |
| <b>Stroke, n (%)</b>                            | 412 (1.11) | 302 (1.01) | 110 (1.52) | 0.0002  |
| <b>Chronic lower respiratory disease, n (%)</b> | 557(1.49)  | 368 (1.22) | 189 (2.61) | <0.0001 |
| <b>Malignancy, n (%)</b>                        | 354 (0.95) | 255 (0.85) | 99 (1.37)  | <0.0001 |
| <b>Renal failure</b>                            | 230 (0.62) | 164 (0.55) | 66 (0.91)  | 0.0003  |
| <b>CABG*, n (%)</b>                             | 253 (0.68) | 221 (0.74) | 32 (0.44)  | 0.007   |
| <b>PCI*, n (%)</b>                              | 235 (0.63) | 198 (0.66) | 37 (0.51)  | 0.16    |

\*Procedures dating at least 6 months prior to hospitalization for AMI

AMI, acute myocardial infarction; CABG, coronary artery bypass grafting; PCI, percutaneous coronary intervention

Supplementary Table 1 shows the comorbidities for each 4-year period. All comorbidities except for congenital heart diseases increased significantly over time. Diabetes and hypertension were the most prevalent comorbidities in both men and women but the rates of other comorbidities remained low even in the last period (<4%).

Expressed as AER for death per 100 person-years over the entire period, the overall rate was 1.18, slightly higher for women (1.32) than for men (0.99) (Table 2). Women aged 25–44 years had a nearly 14-fold higher risk (SMR: 13.9, 95% CI: 11.21–16.86) for death compared with the general population, while men of similar age had an approximately 6-fold increased risk (SMR: 5.99, 95% CI: 5.32–6.70). SMRs in patients aged 45–54 years were lower, namely 3.07 (95% CI: 2.91–3.23) and 5.26 (95% CI: 4.72–5.83) in men and women, respectively.

**Table 2. Standardized 4-year mortality ratio by age among 37,276 men and women aged <55 years with a first AMI, 1987–2006**

|              | Age   | Observed <sup>a</sup> | Expected <sup>b</sup> | SMR (95% CI)       | AR <sup>c</sup> | AER <sup>d</sup> |
|--------------|-------|-----------------------|-----------------------|--------------------|-----------------|------------------|
| <b>Men</b>   | 25-44 | 288                   | 48                    | 5.99 (5.32-6.70)   | 1.11            | 0.97             |
|              | 45-54 | 1348                  | 440                   | 3.07 (2.91-3.23)   | 1.42            | 0.99             |
| <b>Women</b> | 25-44 | 93                    | 7                     | 13.9 (11.21-16.86) | 1.54            | 1.45             |
|              | 45-54 | 347                   | 66                    | 5.26 (4.72-5.83)   | 1.55            | 1.28             |
| <b>Men</b>   | 25-54 | 1636                  | 488                   | 3.36 (3.19-3.52)   | 1.35            | 0.99             |
| <b>Women</b> | 25-54 | 440                   | 73                    | 6.06 (5.51-6.64)   | 1.55            | 1.32             |
| <b>All</b>   | 25-54 | 2076                  | 378                   | 5.49 (5.25-5.73)   | 1.39            | 1.18             |

<sup>a</sup>Observed number of deaths in the study population, <sup>b</sup>Expected number of deaths in the general population, <sup>c</sup>Absolute risk after 4-year death per 100 person-years, <sup>d</sup>Absolute excess risk after 4-year death per 100 person-years

AMI, acute myocardial infarction; SMR, standardized 4-year mortality ratio; AR, absolute risk; AER, absolute excess risk

Survival in men improved continuously over the four 5-year periods (Figure 1), while the prognosis in women improved until the third period, then reverted to a rate nearly identical to that in the second period (Figure 2).

Table 3 shows mortality by sex, age group, and period. For men aged 25–44 years, the annual excess risk of dying decreased continuously from 1.38 to 0.50 deaths per 100 person-years from the first to last period, with an SMR of 4.34 (95% CI: 3.04–5.87) during the last 5-year period. Corresponding figures for men aged 45–54 were a decrease from 1.53 to 0.59 with an SMR of 2.43 (95% CI: 2.12–2.76) in the last period (2002–2006). Women displayed more

1  
2  
3 complicated trends, starting from higher absolute risks of dying compared with men,  
4  
5 decreasing sharply until a nadir in 1997–2001, and then increasing to 1.17 and 1.45 deaths per  
6  
7 100 person-years in women aged 25–44 and 45–54, respectively, in the last period. This was  
8  
9 more than twice the risk in men of the corresponding age groups. Very high SMRs were  
10  
11 noted, particularly for the youngest women, at 13.53 (95% CI: 8.36–19.93) in the last period  
12  
13 and 6.42 (5.24–7.73) in women aged 45–54 years.  
14  
15

16  
17  
18 In men aged 25–44 years, the mortality risk decreased by 70% during the study period  
19  
20 (multivariable adjusted HR: 0.30, 95% CI: 0.20–0.44). A similar decrease was seen in men  
21  
22 aged 45–54 years (multivariable adjusted HR: 0.32, 95% CI: 0.27–0.38). Women aged 25–44  
23  
24 years had an overall decline in mortality risk of approximately 50% (multivariable adjusted  
25  
26 HR: 0.47, 95% CI: 0.27–0.83). No significant decrease in mortality risk in the last, compared  
27  
28 with the first period was observed in women aged 45–54 years (age-adjusted HR: 0.77, 95%  
29  
30 CI: 0.59–1.02), but after adjustment for comorbidities there was a significant decrease in risk  
31  
32 (HR: 0.53, 95% CI: 0.39–0.71).  
33  
34  
35  
36  
37  
38  
39  
40  
41  
42  
43  
44  
45  
46  
47  
48  
49  
50  
51  
52  
53  
54  
55  
56  
57  
58  
59  
60

**Table 3. Observed versus expected mortality ratio, estimated over 4 years, standardized mortality ratio, absolute risk, absolute excess risk, and hazard ratio for mortality by age group and period among 37,276 men and women aged <55 years with a first AMI**

| Age, Period      | Observed <sup>a</sup> | Expected <sup>b</sup> | SMR (95% CI)     | AR <sup>c</sup> | AER <sup>d</sup> | HR (95% CI) <sup>e</sup> | HR (95% CI) <sup>f</sup> |
|------------------|-----------------------|-----------------------|------------------|-----------------|------------------|--------------------------|--------------------------|
| <b>Men 25-44</b> |                       |                       |                  |                 |                  |                          |                          |
| 1987-1991        | 113                   | 16                    | 6.88 (5.67–8.20) | 1.61            | 1.38             | 1.0 (ref)                | 1.0 (ref)                |
| 1992-1996        | 81                    | 13                    | 6.16 (4.89–7.57) | 1.25            | 1.05             | 0.76 (0.57–1.01)         | 0.73 (0.55–0.98)         |
| 1997-2001        | 58                    | 10                    | 5.70 (4.33–7.27) | 1.00            | 0.83             | 0.60 (0.43–0.82)         | 0.53 (0.38–0.73)         |
| 2002-2006        | 36                    | 8                     | 4.34 (3.04–5.87) | 0.65            | 0.50             | 0.41(0.28–0.60)          | 0.30 (0.20–0.44)         |
| <b>Men 45-54</b> |                       |                       |                  |                 |                  |                          |                          |
| 1987-1991        | 465                   | 125                   | 3.72 (3.39–4.07) | 2.10            | 1.53             | 1.0 (ref)                | 1.0 (ref) <sup>g</sup>   |
| 1992-1996        | 379                   | 119                   | 3.20 (2.88–3.53) | 1.56            | 1.07             | 0.74 (0.65–0.85)         | 0.70 (0.61–0.81)         |

|    |  |                    |     |     |                     |      |      |                  |                        |
|----|--|--------------------|-----|-----|---------------------|------|------|------------------|------------------------|
| 1  |  |                    |     |     |                     |      |      |                  |                        |
| 2  |  |                    |     |     |                     |      |      |                  |                        |
| 3  |  |                    |     |     |                     |      |      |                  |                        |
| 4  |  |                    |     |     |                     |      |      |                  |                        |
| 5  |  | 1997-2001          | 289 | 108 | 2.69 (2.39–3.00)    | 1.22 | 0.77 | 0.57 (0.49–0.66) | 0.50 (0.43–0.58)       |
| 6  |  |                    |     |     |                     |      |      |                  |                        |
| 7  |  |                    |     |     |                     |      |      |                  |                        |
| 8  |  | 2002-2006          | 215 | 89  | 2.43 (2.12–2.76)    | 0.99 | 0.59 | 0.47 (0.40–0.56) | 0.32 (0.27–0.39)       |
| 9  |  |                    |     |     |                     |      |      |                  |                        |
| 10 |  |                    |     |     |                     |      |      |                  |                        |
| 11 |  | <b>Women 25-44</b> |     |     |                     |      |      |                  |                        |
| 12 |  |                    |     |     |                     |      |      |                  |                        |
| 13 |  |                    |     |     |                     |      |      |                  |                        |
| 14 |  | 1987-1991          | 34  | 2   | 17.55 (12.15–23.94) | 2.39 | 2.26 | 1.0 (ref)        | 1.0 (ref)              |
| 15 |  |                    |     |     |                     |      |      |                  |                        |
| 16 |  |                    |     |     |                     |      |      |                  |                        |
| 17 |  | 1992-1996          | 28  | 2   | 17.99 (11.95–25.27) | 2.17 | 2.05 | 0.93 (0.56–1.55) | 0.85 (0.51–1.42)       |
| 18 |  |                    |     |     |                     |      |      |                  |                        |
| 19 |  |                    |     |     |                     |      |      |                  |                        |
| 20 |  | 1997-2001          | 10  | 2   | 6.07 (2.89–10.42)   | 0.63 | 0.52 | 0.27 (0.13–0.55) | 0.28 (0.14–0.56)       |
| 21 |  |                    |     |     |                     |      |      |                  |                        |
| 22 |  |                    |     |     |                     |      |      |                  |                        |
| 23 |  | 2002-2006          | 21  | 2   | 13.53 (8.36–19.93)  | 1.26 | 1.17 | 0.55 (0.32–0.94) | 0.47(0.27–0.83)        |
| 24 |  |                    |     |     |                     |      |      |                  |                        |
| 25 |  |                    |     |     |                     |      |      |                  |                        |
| 26 |  | <b>Women 45-54</b> |     |     |                     |      |      |                  |                        |
| 27 |  |                    |     |     |                     |      |      |                  |                        |
| 28 |  |                    |     |     |                     |      |      |                  |                        |
| 29 |  | 1987-1991          | 101 | 15  | 6.90 (5.62–8.31)    | 2.25 | 1.93 | 1.0 (ref)        | 1.0 (ref) <sup>h</sup> |
| 30 |  |                    |     |     |                     |      |      |                  |                        |
| 31 |  |                    |     |     |                     |      |      |                  |                        |
| 32 |  | 1992-1996          | 76  | 16  | 4.63 (3.65–5.73)    | 1.45 | 1.14 | 0.64 (0.48–0.87) | 0.56 (0.42–0.76)       |
| 33 |  |                    |     |     |                     |      |      |                  |                        |
| 34 |  |                    |     |     |                     |      |      |                  |                        |
| 35 |  | 1997-2001          | 68  | 19  | 3.58 (2.78–4.48)    | 1.08 | 0.78 | 0.49 (0.36–0.66) | 0.44 (0.32–0.60)       |
| 36 |  |                    |     |     |                     |      |      |                  |                        |
| 37 |  |                    |     |     |                     |      |      |                  |                        |
| 38 |  | 2002-2006          | 102 | 16  | 6.42 (5.24–7.73)    | 1.72 | 1.45 | 0.77 (0.59–1.02) | 0.53 (0.39–0.71)       |
| 39 |  |                    |     |     |                     |      |      |                  |                        |
| 40 |  |                    |     |     |                     |      |      |                  |                        |
| 41 |  |                    |     |     |                     |      |      |                  |                        |
| 42 |  |                    |     |     |                     |      |      |                  |                        |
| 43 |  |                    |     |     |                     |      |      |                  |                        |
| 44 |  |                    |     |     |                     |      |      |                  |                        |
| 45 |  |                    |     |     |                     |      |      |                  |                        |
| 46 |  |                    |     |     |                     |      |      |                  |                        |
| 47 |  |                    |     |     |                     |      |      |                  |                        |
| 48 |  |                    |     |     |                     |      |      |                  |                        |
| 49 |  |                    |     |     |                     |      |      |                  |                        |

1  
2  
3  
4  
5 <sup>a</sup>Observed number of deaths in the study population, <sup>b</sup>Expected number of deaths in the general population, <sup>c</sup>Absolute risk after 4-year death per  
6  
7 100 person-years, <sup>d</sup>Absolute excess risk after 4-year death per 100 person-years, <sup>e</sup> Age adjusted, <sup>f</sup> Multiadjusted for age, diabetes, hypertension,  
8  
9 valvular, congenital heart disease, stroke, chronic respiratory disease, malignancy and renal failure. Adjusted for changes and interaction over  
10  
11 time, malignancy (<sup>g</sup>), chronic respiratory disease (<sup>h</sup>).  
12  
13 AMI, acute myocardial infarction; SMR, standardized mortality ratio; AR, absolute risk; AER, absolute excess risk; HR, hazard ratio; CI,  
14  
15 confidence interval  
16  
17  
18  
19  
20  
21  
22  
23  
24  
25  
26  
27  
28  
29  
30  
31  
32  
33  
34  
35  
36  
37  
38  
39  
40  
41  
42  
43  
44  
45  
46  
47  
48  
49

Table 4 shows causes of death for the 2,076 deaths that occurred within 4 years in this cohort. Overall, three of four deaths in men were due to CVD (68.2%) with the majority (61.0%) due to IHD, leaving 31.8 % due to other causes, including 10.8% due to malignancies. Women displayed a different pattern, with 47.5% due to CVD (41.1% due to IHD), and 52.5% due to other causes (18.4% due to malignancies).

**Table 4. Causes of 2,076 deaths within 4 years among patients aged <55 years with a first AMI<sup>a</sup> during 1987–2006**

| Cause of death          | Total n (%) | Men n (%)   | Women n (%) | P-value |
|-------------------------|-------------|-------------|-------------|---------|
|                         | 2076        | 1636        | 440         |         |
| <b>CVD<sup>b</sup></b>  | 1325 (63.8) | 1116 (68.2) | 209 (47.5)  | <0.0001 |
| <b>IHD<sup>c</sup></b>  | 1179 (56.8) | 998 (61.0)  | 181 (41.1)  | <0.0001 |
| <b>Stroke</b>           | 41 (1.97)   | 31 (1.89)   | 10 (2.27)   | 0.6131  |
| <b>All other causes</b> | 751 (36.2)  | 520 (31.8)  | 231 (52.5)  | <0.0001 |
| <b>Malignancies</b>     | 257 (12.4)  | 176 (10.8)  | 81 (18.4)   | <0.0001 |

<sup>a</sup>AMI, acute myocardial infarction; <sup>b</sup>CVD, cardiovascular disease; <sup>c</sup>IHD, ischaemic heart disease;

In 1987–1991, 74.8% of all deaths within 4 years were due to CVD (78.6% for men and 58.5% for women). However, during the last period, only 48.4% of all deaths were due to CVD (55.4% for men and, notably, only 34.1% for women) (Supplementary Table 2).

## DISCUSSION

The present study showed that young male survivors of AMI have low absolute long-term mortality rates; however, these rates remain between 2- and 4-fold those of the general



1  
2  
3 population. After a favourable development in younger women until 2001, when new criteria  
4 for AMI were adopted and troponins became standard, women had higher absolute mortality  
5 than men in the last period and showed a dramatically higher risk of death than healthy  
6 women. However, fewer than half of all deaths in women were due to CVD in the last period.  
7  
8  
9

10  
11  
12  
13  
14 Few studies have specifically investigated long-term outcomes in young patients with AMI.  
15  
16 One Swedish study based on the Register of Information and Knowledge about Swedish Heart  
17 Intensive Care Admissions (RIKS-HIA)<sup>19</sup> investigated all consecutive patients younger than  
18 46 years treated for ST-elevation myocardial infarction (STEMI) in Sweden, 1995–2006  
19 (1,748 men, 384 women). Long-term annual mortality was around 1% with no difference  
20 between men and women, similar to our study. Accordingly, in absolute terms and consistent  
21 with prior publications from our group,<sup>1</sup> annual mortality rates in AMI survivors younger than  
22 55 years are estimated at about 1%. This is in contrast to older patients in Sweden, among  
23 whom annual mortality rates are about 6% for those aged 65–74 years and more than 12%  
24 among patients aged 75–84 years).<sup>1</sup> The current low absolute mortality figures are a vast  
25 improvement on prior estimates. In a retrospective analysis of 23 published studies from the  
26 prethrombolytic era, the annual death rate after the first year in patients with a first AMI was  
27 5% regardless of age or gender.<sup>20</sup> In the late 1980s, the annual mortality for patients younger  
28 than 55 years was about 2%.<sup>1</sup>  
29  
30  
31  
32  
33  
34  
35  
36  
37  
38  
39  
40  
41  
42  
43  
44  
45  
46

47 There are several reasons for the observed decrease in mortality in younger patients with  
48 AMI. First, several pharmacological and coronary interventions were developed and  
49 implemented during the study period. Nauta et al 2013 showed that patient <55 received  
50 evidence-based medical care and reperfusion to a greater extent than elderly patients.<sup>12</sup>  
51  
52  
53  
54  
55

56 Second, some of the decrease is likely due to changes in diagnostic criteria during the study  
57  
58  
59  
60

1  
2  
3 period, as well as more sensitive methods.<sup>15,21</sup> This may imply that less severe AMIs are  
4  
5 detected, with improved survival, but less specificity, as evidenced by increased comorbidities  
6  
7 over time and a higher proportion of non-CVD deaths in the last period. Third, there have  
8  
9 been changes in clinical presentation, with less severe infarctions,<sup>22,23</sup> and fewer STEMI.<sup>24</sup>  
10  
11 Factors that affect the risk of developing STEMI rather than non-STEMI include smoking<sup>24</sup>  
12  
13 and cardioprotective medications that lower the risk.<sup>25</sup> Declining smoking rates and more  
14  
15 medications used in primary prevention could thus have contributed to milder infarctions and  
16  
17 better survival. Comorbidities increased during the study period. However, this can probably  
18  
19 be derived to improvements in clinical reporting. The striking increase in hypertension can  
20  
21 also probably be attributed to changes in criteria and guidelines management by the WHO.<sup>26</sup>  
22  
23  
24  
25  
26

27  
28 There was a continuous decrease in case fatality among men; however, rates in women did  
29  
30 not follow the same pattern as in men. Mortality in women decreased until the third period  
31  
32 and then increased during the fourth period to the nearly the same level as in the second  
33  
34 period. This may have been due to chance because the numbers were limited. However, it  
35  
36 could also reflect differences in diagnostics. With increasing use of troponins, the rate of  
37  
38 detection has increased, and this effect could be stronger for women than for men. In a study  
39  
40 that simultaneously measured CK-MB and troponin,<sup>27</sup> a 64% and 95% increase in the AMI  
41  
42 rate among men and women, respectively, was observed when using troponins. Accordingly,  
43  
44 the increasing mortality among women hospitalized in 2002–2006 could be due to the capture  
45  
46 of other and more complicated types of myocardial damage because an increase in troponin  
47  
48 levels is also seen in other conditions.<sup>28</sup> Even so, comorbidities, although increasing over  
49  
50 time, were still low in the most recent period.  
51  
52  
53  
54  
55  
56  
57  
58  
59  
60

1  
2  
3 Few studies have compared mortality rates in young patients with AMI with those in the  
4  
5 general population. A record linkage of hospital and mortality data identified 387,452  
6  
7 individuals in England, hospitalized with a main diagnosis of AMI in 2004–2010 and who  
8  
9 survived at least 30 days.<sup>7</sup> Long-term risk of death of any cause among survivors of a first  
10  
11 AMI was twice that in the English general population of equivalent age, highest among  
12  
13 younger patients aged 55–64 years (about 2- to 3-fold for men and women, respectively), and  
14  
15 approached the mortality rate of the general population for those aged 85 years or more.  
16  
17 Estimates for individuals younger than 55 years were not stated. For the period corresponding  
18  
19 to that in the study by Smolina et al.<sup>7</sup> we found mortality ratios of 4.3 and 2.4 for men aged  
20  
21 25–44 and 45–54 years, respectively. For women aged 25–44 years, the estimated mortality  
22  
23 ratio was 13.5, but this was based on very few cases (about four deaths per year). The  
24  
25 estimate of 6.4 for women aged 45–54 years should be more reliable. It should be noted that  
26  
27 women in the general population in this age range have very low mortality rates, which  
28  
29 partially explains the high SMRs in women.  
30  
31  
32  
33  
34  
35

36 The main limitation in the present study is the reliance on administrative registers with no  
37  
38 details of clinical characteristics, such as biomarkers, electrocardiographic findings, smoking,  
39  
40 medication, hyperlipidemia or family history, and a lack of other clinical information, notably  
41  
42 hospital treatment and clinical presentation. Also, we were unable to apply uniform criteria  
43  
44 for diagnosis over time. However, the findings should be applicable to current patients with  
45  
46 AMI in an industrialized modern country. The quality of the data is obviously of fundamental  
47  
48 importance, but validation studies of the IPR indicate reasonable accuracy.<sup>13,29</sup> Incorrect death  
49  
50 certificates could lead to uncertainty with respect to attributing cause of death<sup>14</sup>, but IHD  
51  
52 diagnoses has been estimated to be correct in 87% although the data from this study were  
53  
54 collected two decades ago.<sup>30</sup>  
55  
56  
57  
58  
59  
60

1  
2  
3  
4  
5 The strengths of the study include nationwide coverage with virtually no loss to follow-up and  
6  
7 the large sample size. Given the low mortality in absolute terms, larger populations are  
8  
9 needed, particularly for women, because they constitute less than 20% of the AMI population  
10  
11 younger than 55 years.  
12

## 13 14 15 16 **Conclusions**

17  
18  
19 These data extend and update what is currently known about sex-specific absolute and relative  
20  
21 survival in patients with AMI younger than 55 years, with a large population of more than  
22  
23 35,000 cases during a 20-year period. Among patients surviving for 28 days after AMI, the  
24  
25 annual mortality rates are now comparatively low at approximately 1%. Given the much  
26  
27 lower mortality in this age group in the general population, young survivors of AMI,  
28  
29 particularly women, remain at a much higher risk of death, much of this, however, due to non-  
30  
31 CVD causes. Accordingly, while mortality is low in absolute terms, younger women with  
32  
33 AMI lose the survival advantage women normally have over men. Additional strategies to  
34  
35 bring mortality closer to that which would be expected for this age group are needed, in  
36  
37 particular for women.  
38  
39  
40  
41  
42  
43

## 44 **Contributors**

45  
46 Study concept, design: SN, AR, LB, JB, KWG. Analysis and interpretation of data: SN, TZS,  
47  
48 AR, LB, JB, KWG. Drafting and revised the manuscript: SN, LB, JB, KWG, TZS, KF, SM,  
49  
50 AR. Critical revision of the final version of the manuscript: all authors. SN, LB, JB, KWG,  
51  
52 TZS, KF, SM, AR. Guarantor: AR  
53  
54  
55  
56

## 57 **Funding**

1  
2  
3 This work was supported by the Swedish Research Council [grant number VR 521-2010-  
4 2984]; the Swedish Heart-Lung Foundation [grant number 2012-0325]; and the Swedish  
5  
6  
7 Council for Working Life and Social Research [grant number Epilife 2006-1506], the VGR  
8  
9 region and the Swedish state under the ALF-LUA agreement.  
10

#### 11 12 13 14 **Competing interests:**

15  
16 None declared.  
17  
18  
19

#### 20 21 **Ethical approval**

22 All personal identifiers were removed and replaced with a sequential number in the final data  
23 set. The protocol was approved by the regional Ethics Board of Gothenburg.  
24  
25  
26  
27  
28

#### 29 30 **Provenance and peer review**

31 Not commissioned; externally peer reviewed.  
32  
33  
34  
35

#### 36 37 **Data sharing statement**

38 No additional data are available.  
39  
40  
41

#### 42 **REFERENCES**

- 43  
44  
45 1. Dudas K, Lappas G, Rosengren A. Long-term prognosis after hospital admission for  
46 acute myocardial infarction from 1987 to 2006. *Int J Cardiol* 2012;**155**:400-405.  
47  
48 2. Langorgen J, Igland J, Vollset SE, *et al*. Short-term and long-term case fatality in 11  
49 878 patients hospitalized with a first acute myocardial infarction, 1979-2001: the  
50  
51 Western Norway cardiovascular registry. *Eur J Cardiovasc Prev Rehabil*  
52  
53 2009;**16**:621-627.  
54  
55  
56  
57  
58  
59  
60

- 1  
2  
3 3. Hardoon SL, Whincup PH, Petersen I, *et al.* Trends in longer-term survival following  
4 an acute myocardial infarction and prescribing of evidenced-based medications in  
5 primary care in the UK from 1991: a longitudinal population-based study. *J Epidemiol*  
6  
7  
8  
9  
10  
11  
12  
13  
14  
15  
16  
17 5. Nichols MTN, Scarborough P, Luengo-Fernandez R, *et al.* *European Cardiovascular*  
18  
19  
20  
21  
22  
23  
24  
25  
26  
27  
28  
29  
30  
31  
32  
33  
34  
35  
36  
37  
38  
39  
40  
41  
42  
43  
44  
45  
46  
47  
48  
49  
50  
51  
52  
53  
54  
55  
56  
57  
58  
59  
60
4. Rayner M, Allender S, Scarborough P. Cardiovascular disease in Europe. *Eur J*  
*Cardiovasc Prev Rehabil* 2009;**16 Suppl 2**:S43-S47.
5. Nichols MTN, Scarborough P, Luengo-Fernandez R, *et al.* *European Cardiovascular*  
*Disease Statistics 2012*. European Heart Network, Brussels, European Society of  
Cardiology, Sophia Antipolis; 2012.
6. Fagring AJ, Lappas G, Kjellgren KI, *et al.* Twenty-year trends in incidence and 1-year  
mortality in Swedish patients hospitalised with non-AMI chest pain. Data from 1987-  
2006 from the Swedish hospital and death registries. *Heart* 2010;**96**:1043-1049.
7. Smolina K, Wright FL, Rayner M, *et al.* Long-term survival and recurrence after acute  
myocardial infarction in England, 2004 to 2010. *Circ Cardiovasc Qual Outcomes*  
2012;**5**:532-540.
8. Gale CP, Cattle B, Woolston A, *et al.* Resolving inequalities in care? Reduced  
mortality in the elderly after acute coronary syndromes. The Myocardial Ischaemia  
National Audit Project 2003-2010. *Eur Heart J* 2012;**33**:630-639.
9. Rosengren A, Spetz CL, Koster M, *et al.* Sex differences in survival after myocardial  
infarction in Sweden; data from the Swedish National Acute Myocardial Infarction  
Register. *Eur Heart J* 2001;**22**:314-322.
10. Vaccarino V, Krumholz HM, Yarzebski J, *et al.* Sex differences in 2-year mortality  
after hospital discharge for myocardial infarction. *Ann Intern Med* 2001;**134**:173-181.

- 1  
2  
3 11. Nauta ST, Deckers JW, van Domburg RT, *et al.* Sex-related trends in mortality in  
4 hospitalized men and women after myocardial infarction between 1985 and 2008:  
5 equal benefit for women and men. *Circulation* 2012;**126**:2184-2189.  
6  
7
- 8  
9 12. Nauta ST, Decker JW, Akkerhuis KM, *et al.* Age-dependent care and long-term (20  
10 year) mortality of 14,434 myocardial infarction patients: Changes from 1985 to 2008.  
11  
12 *Int. J Cardiol* 2013;**167**:693-697  
13  
14
- 15 13. Ludvigsson JF, Andersson E, Ekbom A, *et al.* External review and validation of the  
16 Swedish national inpatient register. *BMC Public Health* 2011;**11**:450.  
17  
18
- 19 14. Swedish National Board of Health and Welfare, Cause of death statistics - history,  
20 production methods and reliability. 2010.  
21  
22 <http://www.socialstyrelsen.se/publikationer2010/2010-4-33> (Accessed 16 sept 2013)  
23  
24
- 25 15. Alpert JS, Thygesen K, Antman E, *et al.* Myocardial infarction redefined--a consensus  
26 document of The Joint European Society of Cardiology/American College of  
27 Cardiology Committee for the redefinition of myocardial infarction. *J Am Coll*  
28 *Cardiol* 2000;**36**:959-969.  
29  
30
- 31 16. Tunstall-Pedoe H, Kuulasmaa K, Amouyel P, *et al.* Myocardial infarction and  
32 coronary deaths in the World Health Organization MONICA Project. Registration  
33 procedures, event rates, and case-fatality rates in 38 populations from 21 countries in  
34 four continents. *Circulation* 1994;**90**:583-612.  
35  
36
- 37 17. Cox DR. Regression models and life-tables. *J R Stat Soc Series B Stat Methodol*  
38 1972;**34**:187-220.  
39  
40
- 41 18. Allison PD. *Survival Analysis Using SAS: A Practical Guide*. Cary, NC: SAS  
42 Institute; 2010.  
43  
44  
45  
46  
47  
48  
49  
50  
51  
52  
53  
54  
55  
56  
57  
58  
59  
60

- 1  
2  
3 19. Lawesson SS, Stenestrand U, Lagerqvist B, *et al.* Gender perspective on risk factors,  
4 coronary lesions and long-term outcome in young patients with ST-elevation  
5 myocardial infarction. *Heart* 2010;**96**:453-459.  
6  
7
- 8  
9 20. Law MR, Watt HC, Wald NJ. The underlying risk of death after myocardial infarction  
10 in the absence of treatment. *Arch Intern Med* 2002;**162**:2405-2410.  
11  
12
- 13 21. Parikh NI, Gona P, Larson MG, *et al.* Long-term trends in myocardial infarction  
14 incidence and case fatality in the National Heart, Lung, and Blood Institute's  
15 Framingham Heart study. *Circulation* 2009;**119**:1203-1210.  
16  
17
- 18 22. Myerson M, Coady S, Taylor H, *et al.* Declining severity of myocardial infarction  
19 from 1987 to 2002: the Atherosclerosis Risk in Communities (ARIC) Study.  
20  
21  
22  
23  
24  
25  
26  
27  
28 23. Goff DC Jr, Howard G, Wang CH, *et al.* Trends in severity of hospitalized myocardial  
29 infarction: the atherosclerosis risk in communities (ARIC) study, 1987-1994. *Am*  
30  
31  
32  
33  
34  
35 24. Bjorck L, Rosengren A, Wallentin L, *et al.* Smoking in relation to ST-segment  
36 elevation acute myocardial infarction: findings from the Register of Information and  
37 Knowledge about Swedish Heart Intensive Care Admissions. *Heart* 2009;**95**:1006-  
38  
39  
40  
41  
42  
43  
44  
45  
46  
47  
48  
49  
50  
51  
52 25. Bjorck L, Wallentin L, Stenestrand U, *et al.* Medication in relation to ST-segment  
53 elevation myocardial infarction in patients with a first myocardial infarction: Swedish  
54 Register of Information and Knowledge about Swedish Heart Intensive Care  
55 Admissions (RIKS-HIA). *Arch Intern Med* 2010;**170**:1375-1381.  
56  
57  
58  
59  
60
26. Luepker RV, Duval S, Jacobs DR Jr, *et al.* The effect of changing diagnostic  
algorithms on acute myocardial infarction rates. *Ann Epidemiol* 2011;**21**:824-829.



- 1  
2  
3 27 World Health Organization, international Society of hypertension Writing Group.  
4  
5 2003 World Health Organization (WHO)/International Society of Hypertension (ISH)  
6  
7 statement on management of hypertension. *J Hypertens* 2003;21:1983-1992  
8  
9  
10 28. Meier MA, Al-Badr WH, Cooper JV, *et al.* The new definition of myocardial  
11  
12 infarction: diagnostic and prognostic implications in patients with acute coronary  
13  
14 syndromes. *Arch Intern Med* 2002;162:1585-1589.  
15  
16 29. Hammar N, Alfredsson L, Rosen M, *et al.* . A national record linkage to study acute  
17  
18 myocardial infarction incidence and case fatality in Sweden. *Int J Epidemiol* 2001;30  
19  
20 **Suppl 1**:S30-S34.  
21  
22  
23  
24 30 Johansson LA, Björkenstam C, Westerling R. Unexplained differences between  
25  
26 hospital and mortality data indicated mistakes in death certification: an investigation  
27  
28 of 1,094 deaths in Sweden during 1995. *J Clin Epidemiol* 2009;62:1202-1209  
29  
30  
31  
32  
33  
34  
35  
36  
37  
38  
39  
40  
41  
42  
43  
44  
45  
46  
47  
48  
49  
50  
51  
52  
53  
54  
55  
56  
57  
58  
59  
60

1  
2  
3 **FIGURE LEGENDS**  
4

5  
6  
7 **Figure 1** Four-year trend in survival probability by period and time among men (n 30 047)  
8  
9 aged 25–54 years with a first AMI  
10

11  
12  
13  
14  
15 **Figure 2** Four-year trend in survival probability by period and time among women (n 7 229)  
16  
17 aged 25–54 years with a first AMI  
18  
19  
20  
21  
22  
23  
24  
25  
26  
27  
28  
29  
30  
31  
32  
33  
34  
35  
36  
37  
38  
39  
40  
41  
42  
43  
44  
45  
46  
47  
48  
49  
50  
51  
52  
53  
54  
55  
56  
57  
58  
59  
60

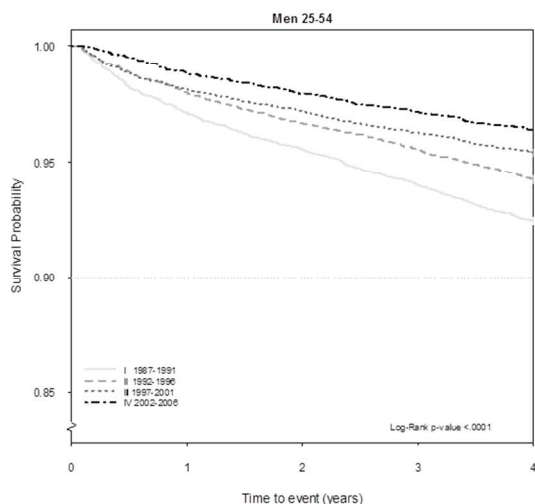

| No at risk | 0    | 1    | 2    | 3    | 4    |
|------------|------|------|------|------|------|
| 1987-1991  | 7628 | 7404 | 7288 | 7169 | 7050 |
| 1992-1996  | 7946 | 7783 | 7678 | 7589 | 7486 |
| 1997-2001  | 7558 | 7412 | 7345 | 7273 | 7212 |
| 2002-2006  | 6915 | 6831 | 6770 | 6717 | 6664 |

Figure 1, Four-year trend in survival probability by period and time among men (n 30 047) aged 25–54 years with a first AMI  
 254x190mm (300 x 300 DPI)

ew only

1  
2  
3  
4  
5  
6  
7  
8  
9  
10  
11  
12  
13  
14  
15  
16  
17  
18  
19  
20  
21  
22  
23  
24  
25  
26  
27  
28  
29  
30  
31  
32  
33  
34  
35  
36  
37  
38  
39  
40  
41  
42  
43  
44  
45  
46  
47  
48  
49  
50  
51  
52  
53  
54  
55  
56  
57  
58  
59  
60

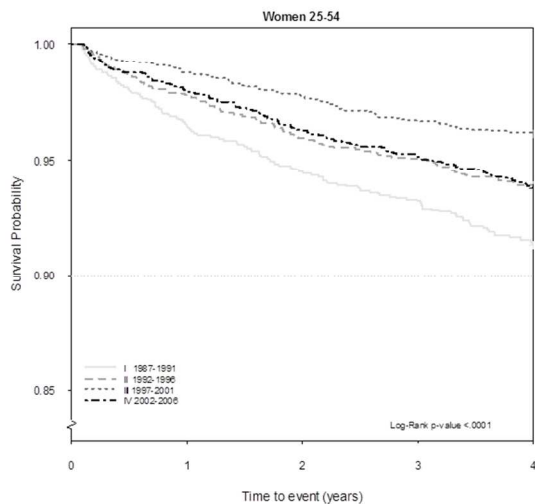

| No at risk | 0    | 1    | 2    | 3    | 4    |
|------------|------|------|------|------|------|
| 1987-1991  | 1556 | 1501 | 1470 | 1450 | 1421 |
| 1992-1996  | 1693 | 1655 | 1624 | 1609 | 1589 |
| 1997-2001  | 2014 | 1988 | 1968 | 1947 | 1936 |
| 2002-2006  | 1966 | 1926 | 1892 | 1870 | 1843 |

Figure 2 Four-year trend in survival probability by period and time among women (n 7 229) aged 25–54 years with a first AMI  
254x190mm (300 x 300 DPI)

ew only

Supplemental Table 1: Baseline characteristics by period among 37,276 men and women with a first AMI, 1987–2006

|                                   |       | 1987-1991   | 1992-1996   | 1997-2001   | 2002-2006   | p for trend |
|-----------------------------------|-------|-------------|-------------|-------------|-------------|-------------|
| <b>Number of patients</b>         | Men   | 7628 (83.1) | 7946 (82.4) | 7558 (79.0) | 6915 (77.9) |             |
| <b>Number of patients</b>         | Women | 1556 (16.9) | 1693 (17.6) | 2014 (21.0) | 1966 (22.1) |             |
| <b>Diabetes</b>                   | Men   | 542 (7.11)  | 728 (9.16)  | 814 (10.8)  | 933 (13.5)  | <.0001      |
|                                   | Women | 200 (12.9)  | 244 (14.4)  | 276 (13.7)  | 327 (16.6)  | 0.0043      |
| <b>Hypertension</b>               | Men   | 451 (5.91)  | 655 (8.24)  | 807 (10.7)  | 1228 (17.8) | <.0001      |
|                                   | Women | 106 (6.81)  | 188 (11.1)  | 252 (12.5)  | 423 (21.52) | <.0001      |
| <b>Valvular disease</b>           | Men   | 35 (0.47)   | 34 (0.43)   | 53 (0.70)   | 89 (1.29)   | <.0001      |
|                                   | Women | 11 (0.71)   | 16 (0.95)   | 17 (0.84)   | 32 (1.63)   | 0.0125      |
| <b>Congenital heart disease</b>   | Men   | 7 (0.09)    | 1 (0.01)    | 6 (0.08)    | 9 (0.13)    | 0.2212      |
|                                   | Women | 1 (0.06)    | 3 (0.18)    | 4 (0.20)    | 5 (0.25)    | 0.1981      |
| <b>Stroke</b>                     | Men   | 36 (0.47)   | 52 (0.65)   | 40 (0.53)   | 174 (2.52)  | <.0001      |
|                                   | Women | 10 (0.64)   | 18 (1.06)   | 21 (1.04)   | 61 (3.10)   | <.0001      |
| <b>Chronic lower resp disease</b> | Men   | 61 (0.80)   | 77 (0.97)   | 86 (1.14)   | 144 (2.08)  | <.0001      |
|                                   | Women | 26 (1.67)   | 41 (2.42)   | 46 (2.28)   | 76 (3.87)   | 0.0001      |

1  
2  
3  
4  
5  
6  
7  
8  
9  
10  
11  
12  
13  
14  
15  
16  
17  
18  
19  
20  
21  
22  
23  
24  
25  
26  
27  
28  
29  
30  
31  
32  
33  
34  
35  
36  
37  
38  
39  
40  
41  
42  
43  
44  
45  
46  
47  
48  
49

|                      |       |           |           |           |            |        |
|----------------------|-------|-----------|-----------|-----------|------------|--------|
| <b>Malignancy</b>    | Men   | 11 (0.14) | 24 (0.30) | 55 (0.73) | 165 (2.39) | <.0001 |
|                      | Women | 10 (0.64) | 17 (1.00) | 14 (0.70) | 58 (2.95)  | <.0001 |
| <b>Renal failure</b> | Men   | 7 (0.09)  | 25 (0.31) | 47 (0.62) | 85 (1.23)  | <.0001 |
|                      | Women | 3 (0.19)  | 15 (0.89) | 13 (0.65) | 35 (1.78)  | <.0001 |

---

For peer review only

Supplemental Table 2: Cause of death by period for 2,076 deaths within 4 years among patients with a first AMI during 1987–2006

| Cause of death          | Total n (%) | Men n (%)  | Women n (%) | p-value |
|-------------------------|-------------|------------|-------------|---------|
| <b>1987-1991</b>        | 713         | 578 (81.1) | 135 (18.9)  |         |
| <b>CVD</b>              | 533(74.8)   | 454(78.6)  | 79 (58.5)   | <.0001  |
| <b>IHD</b>              | 481 (67.5)  | 405 (70.1) | 76 (56.3)   | 0.0021  |
| <b>Stroke</b>           | 18 (2.52)   | 16(2.77)   | 2 (1.48)    | 0.3909  |
| <b>All other causes</b> | 180 (25.3)  | 124 (21.5) | 56 (41.5)   | <.0001  |
| <b>Malignancies</b>     | 55 (7.71)   | 39 (6.75)  | 16 (11.9)   | 0.0454  |
| <b>1992-1996</b>        | 564         | 460 (81.6) | 104 (18.4)  |         |
| <b>CVD</b>              | 369 (65.4)  | 318 (69.1) | 51 (49.0)   | <.0001  |
| <b>IHD</b>              | 337 (59.8)  | 295 (64.1) | 42 (40.4)   | <.0001  |
| <b>Stroke</b>           | 6 (1.06)    | 5 (1.09)   | 1 (0.96)    | 0.9104  |
| <b>All other causes</b> | 195 (34.6)  | 142 (30.9) | 53 (51.0)   | <.0001  |
| <b>Malignancies</b>     | 79 (14.01)  | 57 (12.4)  | 22 (21.2)   | 0.0201  |
| <b>1997-2001</b>        | 425         | 347 (81.7) | 78 (18.4)   |         |
| <b>CVD</b>              | 242 (56.9)  | 205 (59.1) | 37 (47.4)   | 0.0606  |
| <b>IHD</b>              | 216 (50.8)  | 182 (52.5) | 34 (43.6)   | 0.1573  |
| <b>Stroke</b>           | 5 (1.18)    | 3 (0.86)   | 2 (2.56)    | 0.2084  |
| <b>All other causes</b> | 183 (43.1)  | 142 (40.9) | 41 (52.6)   | 0.0606  |
| <b>Malignancies</b>     | 63 (14.8)   | 52(15.0)   | 11 (14.1)   | 0.8428  |
| <b>2002-2006</b>        | 374         | 251 (67.1) | 123 (32.9)  |         |
| <b>CVD</b>              | 181 (48.4)  | 139 (55.4) | 42 (34.1)   | 0.0001  |
| <b>IHD</b>              | 145 (38.8)  | 116 (46.2) | 29 (23.6)   | <0.0001 |

|   |                         |            |            |           |         |
|---|-------------------------|------------|------------|-----------|---------|
| 1 |                         |            |            |           |         |
| 2 |                         |            |            |           |         |
| 3 | <b>Stroke</b>           | 12 (3.21)  | 7 (2.79)   | 5 (4.07)  | 0.5106  |
| 4 |                         |            |            |           |         |
| 5 | <b>All other causes</b> | 193 (51.6) | 112 (44.6) | 81(65.9)  | 0.00001 |
| 6 |                         |            |            |           |         |
| 7 | <b>Malignancies</b>     | 60 (16.0)  | 28 (11.2)  | 32 (26.0) | 0.0002  |
| 8 |                         |            |            |           |         |

---

9 AMI, acute myocardial infarction; IHD, ischaemic heart disease; CVD, cardiovascular  
10  
11 disease  
12

13  
14  
15  
16  
17  
18  
19  
20  
21  
22  
23  
24  
25  
26  
27  
28  
29  
30  
31  
32  
33  
34  
35  
36  
37  
38  
39  
40  
41  
42  
43  
44  
45  
46  
47  
48  
49  
50  
51  
52  
53  
54  
55  
56  
57  
58  
59  
60

For peer review only



## STROBE Statement—checklist of items that should be included in reports of observational studies

|                           | Item No | Recommendation                                                                                                                                                                                                                                                                                                                                                                                                                                                                                                                  |
|---------------------------|---------|---------------------------------------------------------------------------------------------------------------------------------------------------------------------------------------------------------------------------------------------------------------------------------------------------------------------------------------------------------------------------------------------------------------------------------------------------------------------------------------------------------------------------------|
| <b>Title and abstract</b> | 1       | (a) Indicate the study's design with a commonly used term in the title or the abstract<br><br>Title: Sex-specific trends in survival in 37,276 men and women with acute myocardial infarction before the age of 55 years in Sweden, 1987–2006.<br><br>Prospective cohort study.                                                                                                                                                                                                                                                 |
|                           |         | (b) Provide in the abstract an informative and balanced summary of what was done and what was found<br><br>Please see page 2                                                                                                                                                                                                                                                                                                                                                                                                    |
| <b>Introduction</b>       |         |                                                                                                                                                                                                                                                                                                                                                                                                                                                                                                                                 |
| Background/rationale      | 2       | Explain the scientific background and rationale for the investigation being reported<br><br>Please see page 4-5                                                                                                                                                                                                                                                                                                                                                                                                                 |
| Objectives                | 3       | State specific objectives, including any prespecified hypotheses<br><br>Please see page 5                                                                                                                                                                                                                                                                                                                                                                                                                                       |
| <b>Methods</b>            |         |                                                                                                                                                                                                                                                                                                                                                                                                                                                                                                                                 |
| Study design              | 4       | Present key elements of study design early in the paper<br><br>Please see page 5                                                                                                                                                                                                                                                                                                                                                                                                                                                |
| Setting                   | 5       | Describe the setting, locations, and relevant dates, including periods of recruitment, exposure, follow-up, and data collection<br><br>Please see page 5-6                                                                                                                                                                                                                                                                                                                                                                      |
| Participants              | 6       | (a) <i>Cohort study</i> —Give the eligibility criteria, and the sources and methods of selection of participants. Describe methods of follow-up<br><br>Please see page 5-6<br><br><i>Case-control study</i> —Give the eligibility criteria, and the sources and methods of case ascertainment and control selection. Give the rationale for the choice of cases and controls<br><br>N/A<br><br><i>Cross-sectional study</i> —Give the eligibility criteria, and the sources and methods of selection of participants<br><br>N/A |
|                           |         | (b) <i>Cohort study</i> —For matched studies, give matching criteria and number of exposed and unexposed<br><br>N/A                                                                                                                                                                                                                                                                                                                                                                                                             |

1  
2  
3  
4  
5  
6  
7

*Case-control study*—For matched studies, give matching criteria and the number of controls per case  
N/A

---

8  
9  
10  
11  
12

|           |   |                                                                                                                                                                     |
|-----------|---|---------------------------------------------------------------------------------------------------------------------------------------------------------------------|
| Variables | 7 | Clearly define all outcomes, exposures, predictors, potential confounders, and effect modifiers. Give diagnostic criteria, if applicable<br><br>Please see page 5-6 |
|-----------|---|---------------------------------------------------------------------------------------------------------------------------------------------------------------------|

---

13  
14  
15  
16  
17

|                              |    |                                                                                                                                                                                                                 |
|------------------------------|----|-----------------------------------------------------------------------------------------------------------------------------------------------------------------------------------------------------------------|
| Data sources/<br>measurement | 8* | For each variable of interest, give sources of data and details of methods of assessment (measurement). Describe comparability of assessment methods if there is more than one group<br><br>Please see page 5-6 |
|------------------------------|----|-----------------------------------------------------------------------------------------------------------------------------------------------------------------------------------------------------------------|

---

18  
19  
20

|      |   |                                                                      |
|------|---|----------------------------------------------------------------------|
| Bias | 9 | Describe any efforts to address potential sources of bias<br><br>N/A |
|------|---|----------------------------------------------------------------------|

---

21  
22  
23  
24

|            |    |                                                                                                                       |
|------------|----|-----------------------------------------------------------------------------------------------------------------------|
| Study size | 10 | Explain how the study size was arrived at<br><br>N/A. All patients in Sweden in the relevant age group were included. |
|------------|----|-----------------------------------------------------------------------------------------------------------------------|

---

25  
26  
27  
28  
29

|                        |    |                                                                                                                                                       |
|------------------------|----|-------------------------------------------------------------------------------------------------------------------------------------------------------|
| Quantitative variables | 11 | Explain how quantitative variables were handled in the analyses. If applicable, describe which groupings were chosen and why<br><br>Please see page 6 |
|------------------------|----|-------------------------------------------------------------------------------------------------------------------------------------------------------|

---

30  
31  
32  
33  
34  
35  
36  
37  
38  
39  
40  
41  
42  
43  
44  
45  
46  
47  
48  
49  
50  
51  
52

|                     |    |                                                                                                                                                                                                                                                                                                                                                                                                                                                                                                                                                                                                                                                                         |
|---------------------|----|-------------------------------------------------------------------------------------------------------------------------------------------------------------------------------------------------------------------------------------------------------------------------------------------------------------------------------------------------------------------------------------------------------------------------------------------------------------------------------------------------------------------------------------------------------------------------------------------------------------------------------------------------------------------------|
| Statistical methods | 12 | (a) Describe all statistical methods, including those used to control for confounding<br><br>Please see page 7-8<br><br>(b) Describe any methods used to examine subgroups and interactions<br><br>Please see page 7-8<br><br>(c) Explain how missing data were addressed<br><br>N/A<br><br>(d) <i>Cohort study</i> —If applicable, explain how loss to follow-up was addressed<br><br>Loss to follow-up negligible<br><br><i>Case-control study</i> —If applicable, explain how matching of cases and controls was addressed<br><br>N/A<br><br><i>Cross-sectional study</i> —If applicable, describe analytical methods taking account of sampling strategy<br><br>N/A |
|---------------------|----|-------------------------------------------------------------------------------------------------------------------------------------------------------------------------------------------------------------------------------------------------------------------------------------------------------------------------------------------------------------------------------------------------------------------------------------------------------------------------------------------------------------------------------------------------------------------------------------------------------------------------------------------------------------------------|

---

53  
54  
55  
56

(e) Describe any sensitivity analyses  
  
N/A

Continued on next page

## Results

|                  |     |                                                                                                                                                                                                                                                                                                                                                                                                                                                                                                                                                                               |
|------------------|-----|-------------------------------------------------------------------------------------------------------------------------------------------------------------------------------------------------------------------------------------------------------------------------------------------------------------------------------------------------------------------------------------------------------------------------------------------------------------------------------------------------------------------------------------------------------------------------------|
| Participants     | 13* | (a) Report numbers of individuals at each stage of study—eg numbers potentially eligible, examined for eligibility, confirmed eligible, included in the study, completing follow-up, and analysed<br><br><a href="#">Please see page 5</a><br><br>(b) Give reasons for non-participation at each stage<br><br><a href="#">N/A</a><br><br>(c) Consider use of a flow diagram<br><br><a href="#">N/A</a>                                                                                                                                                                        |
| Descriptive data | 14* | (a) Give characteristics of study participants (eg demographic, clinical, social) and information on exposures and potential confounders<br><br><a href="#">Please see page 5-6</a><br><br>(b) Indicate number of participants with missing data for each variable of interest<br><br><a href="#">N/A</a><br><br>(c) <i>Cohort study</i> —Summarise follow-up time (eg, average and total amount)<br><br><a href="#">Please see page 6</a>                                                                                                                                    |
| Outcome data     | 15* | <i>Cohort study</i> —Report numbers of outcome events or summary measures over time<br><br><a href="#">Please see Table 2 and 3 , and page 15.</a><br><br><i>Case-control study</i> —Report numbers in each exposure category, or summary measures of exposure<br><br><a href="#">N/A</a><br><br><i>Cross-sectional study</i> —Report numbers of outcome events or summary measures<br><br><a href="#">N/A</a>                                                                                                                                                                |
| Main results     | 16  | (a) Give unadjusted estimates and, if applicable, confounder-adjusted estimates and their precision (eg, 95% confidence interval). Make clear which confounders were adjusted for and why they were included<br><br><a href="#">Please see Table 2 and 3, and statistical methods.</a><br><br>(b) Report category boundaries when continuous variables were categorized<br><br><a href="#">Done</a><br><br>(c) If relevant, consider translating estimates of relative risk into absolute risk for a meaningful time period<br><br><a href="#">Please see Tables 2 and 3.</a> |
| Other analyses   | 17  | Report other analyses done—eg analyses of subgroups and interactions, and sensitivity                                                                                                                                                                                                                                                                                                                                                                                                                                                                                         |

1  
2 analyses

3  
4  
5 [Please see page 15](#)

---

6 **Discussion**

7 Key results 18 Summarise key results with reference to study objectives

8  
9  
10 [Please see page 15-16](#)

11 Limitations 19 Discuss limitations of the study, taking into account sources of potential bias or imprecision.  
12 Discuss both direction and magnitude of any potential bias

13  
14 [Please see page 18-19](#)

15 Interpretation 20 Give a cautious overall interpretation of results considering objectives, limitations, multiplicity  
16 of analyses, results from similar studies, and other relevant evidence

17  
18  
19 [Please see page 15-19](#)

20 Generalisability 21 Discuss the generalisability (external validity) of the study results

21  
22  
23 [Please see page 18](#)

---

24 **Other information**

25 Funding 22 Give the source of funding and the role of the funders for the present study and, if applicable,  
26 for the original study on which the present article is based

27  
28  
29 [Please see page 19](#)

30  
31  
32 \*Give information separately for cases and controls in case-control studies and, if applicable, for exposed and  
33 unexposed groups in cohort and cross-sectional studies.

34  
35 **Note:** An Explanation and Elaboration article discusses each checklist item and gives methodological background and  
36 published examples of transparent reporting. The STROBE checklist is best used in conjunction with this article (freely  
37 available on the Web sites of PLoS Medicine at <http://www.plosmedicine.org/>, Annals of Internal Medicine at  
38 <http://www.annals.org/>, and Epidemiology at <http://www.epidem.com/>). Information on the STROBE Initiative is  
39 available at [www.strobe-statement.org](http://www.strobe-statement.org).

40  
41  
42  
43  
44  
45  
46  
47  
48  
49  
50  
51  
52  
53  
54  
55  
56  
57  
58  
59  
60

# BMJ Open

## Sex-specific trends in four-year survival in 37,276 men and women with acute myocardial infarction before the age of 55 years in Sweden, 1987–2006. A register-based cohort study.

|                                 |                                                                                                                                                                                                                                                                                                                                                                                                                                                                                                                                                                                                                                                                                                            |
|---------------------------------|------------------------------------------------------------------------------------------------------------------------------------------------------------------------------------------------------------------------------------------------------------------------------------------------------------------------------------------------------------------------------------------------------------------------------------------------------------------------------------------------------------------------------------------------------------------------------------------------------------------------------------------------------------------------------------------------------------|
| Journal:                        | <i>BMJ Open</i>                                                                                                                                                                                                                                                                                                                                                                                                                                                                                                                                                                                                                                                                                            |
| Manuscript ID:                  | bmjopen-2013-004598.R1                                                                                                                                                                                                                                                                                                                                                                                                                                                                                                                                                                                                                                                                                     |
| Article Type:                   | Research                                                                                                                                                                                                                                                                                                                                                                                                                                                                                                                                                                                                                                                                                                   |
| Date Submitted by the Author:   | 03-Apr-2014                                                                                                                                                                                                                                                                                                                                                                                                                                                                                                                                                                                                                                                                                                |
| Complete List of Authors:       | Nielsen, Susanne; Institute of medicine, Department of Molecular and Clinical Medicine<br>Björck, Lena; Department of Molecular and Clinical Medicine, Sahlgrenska Academy<br>Berg, Johanna; Department of Molecular and Clinical Medicine, Sahlgrenska Academy<br>Giang, Kok Wai; Department of Molecular and Clinical Medicine, Sahlgrenska Academy<br>Zverkova-Sandström, Tatiana; Department of Molecular and Clinical Medicine, Sahlgrenska Academy<br>Falk, Kristin; Institute of Health and Care Sciences, Sahlgrenska Academy, Määtä, Sylvia; Institute of Health and Care Sciences, Sahlgrenska Academy,<br>Rosengren, Annika; Department of Molecular and Clinical Medicine, Sahlgrenska Academy |
| <b>Primary Subject Heading</b>: | Cardiovascular medicine                                                                                                                                                                                                                                                                                                                                                                                                                                                                                                                                                                                                                                                                                    |
| Secondary Subject Heading:      | Cardiovascular medicine                                                                                                                                                                                                                                                                                                                                                                                                                                                                                                                                                                                                                                                                                    |
| Keywords:                       | Epidemiology < TROPICAL MEDICINE, Coronary heart disease < CARDIOLOGY, Myocardial infarction < CARDIOLOGY                                                                                                                                                                                                                                                                                                                                                                                                                                                                                                                                                                                                  |
|                                 |                                                                                                                                                                                                                                                                                                                                                                                                                                                                                                                                                                                                                                                                                                            |

SCHOLARONE™  
Manuscripts

1  
2  
3 **Sex-specific trends in four-year survival in 37,276 men and women with**  
4  
5 **acute myocardial infarction before the age of 55 years in Sweden, 1987–**  
6  
7  
8 **2006. A register-based cohort study.**  
9

10  
11  
12  
13  
14 Nielsen S, MSc<sup>1</sup>, Björck L, PhD<sup>1,2</sup>, Berg J, MD<sup>1</sup>, Giang KW, MSc<sup>1</sup>, Zverkova Sandström T,  
15 BSc<sup>1</sup>, Falk K, PhD<sup>2</sup>, Määttä S, PhD<sup>2</sup>, Rosengren A, MD, PhD<sup>1\*</sup>  
16  
17  
18

19  
20 <sup>1</sup>Department of Molecular and Clinical Medicine and <sup>2</sup>Institute of Health and Care Sciences,  
21 Sahlgrenska Academy, University of Gothenburg, Gothenburg, Sweden  
22  
23  
24

25  
26  
27 \*Corresponding author: Annika Rosengren, Department of Molecular and Clinical Medicine,  
28 Sahlgrenska University Hospital/Östra, SE-41685, Gothenburg, Sweden. E-mail:  
29 annika.rosengren@gu.se; Tel: +46 31343 4086; Fax: +46 31258933  
30  
31  
32  
33  
34  
35  
36  
37

38 **Keywords** Myocardial Infarction • Mortality • Survival • Trends • Epidemiology  
39  
40  
41  
42

43  
44 **Word count:** Abstract: 269  
45

46  
47 Manuscript: 3400  
48  
49  
50  
51  
52  
53  
54  
55  
56  
57  
58  
59  
60

## ABSTRACT

**Objective** To examine sex-specific trends in 4-year mortality among young patients with a first acute myocardial infarction (AMI), 1987–2006.

**Design:** Prospective cohort study

**Setting:** Sweden.

**Participants:** We identified 37,276 cases (19.4% women; age, 25–54 years) from the Swedish Inpatient Register, 1987–2006, who had survived 28 days after an AMI.

**Outcome measures:** Four-year mortality from all causes, and Standard Mortality Ratio (SMR)

**Results** From the first to last 5-year period, the absolute excess risk decreased from 1.38 to 0.50 and 1.53 to 0.59 per 100 person-years among men aged 25–44 and 45–54 years, respectively. Corresponding figures for women were a decrease from 2.26 to 1.17 and from 1.93 to 1.45 per 100 person-years, respectively. Trends for women were non-linear, decreasing to the same extent as those for men until the third period, then increasing. For the last 5-year period, the standardized mortality ratio for young survivors of AMI compared with the general population was 4.34 (95% confidence interval [CI]: 3.04–5.87) and 2.43 (95% CI: 2.12–2.76) for men aged 25–44 and 45–54 years, respectively, and 13.53 (95% CI: 8.36–19.93) and 6.42 (95% CI: 5.24–7.73) for women. Deaths not associated with cardiovascular causes increased from 21.5% to 44.6% in men and 41.5% to 65.9% in women, respectively.

**Conclusion** Young male survivors of AMI have low absolute long-term mortality rates, but these rates remain 2- to 4-fold that of the general population. After favourable development until 2001, women now have higher absolute mortality than men and a 6- to 14-fold risk of death compared with women in the general population.

**Strengths and limitations of this study**

- Population-based study, that includes all cases with a first AMI, aged 25-55 years, in Sweden during a period of twenty years.
- Strengths include nationwide coverage, and near-complete follow-up.
- The main limitation is that the used register does not provide data covering clinical characteristics or treatment which could have been valuable to estimate their impact on mortality.



## INTRODUCTION

Survival after acute myocardial infarction (AMI) has improved during the last several decades in Sweden and elsewhere.<sup>1-3</sup> Nonetheless, coronary heart disease (CHD) remains a major contributor to morbidity and mortality with more than one in five men and women currently dying from CHD in Europe.<sup>4,5</sup> Survivors of AMI are known to have an impaired prognosis compared with the general population.<sup>6</sup> In a recent study from England, the long-term risk of death of any cause among survivors of a first AMI was twice that of the general English population of equivalent age.<sup>7</sup>

Most patients with AMI are elderly; accordingly, most information on long-term survival is based on patients older than 55 years. However, about one in six AMI survivors is younger than 55 years.<sup>8</sup> Knowledge of the prognosis among young patients with AMI is essential because younger patients stand to lose more of their remaining life years compared with older patients. This applies particularly to women because women have a longer life expectancy.

Further, younger, but not older, women hospitalized with AMI have a worse long-term prognosis than men as shown in analyses of patient populations dating from the 1980s and 1990s.<sup>9,10</sup> However, there have since been marked changes in treatment, diagnostic criteria, and post-AMI prognosis. A recent study found that reductions in long-term mortality after 1985 were at least as high for women as for men with AMI,<sup>11</sup> but the study did not specifically report findings for young patients. An additional study, found that reductions in mortality were similar regardless of age but that younger patients are more likely to receive evidence based care.<sup>12</sup>

1  
2  
3 Few data sets contain a sufficient number of young patients to reliably estimate risk of death  
4 compared with the general population. In addition, more information is needed about cause-  
5 specific mortality, because an unknown proportion of deaths may not be due to cardiovascular  
6 causes, and will thus be less amenable to coronary preventive measures. In the present study,  
7 we examined sex-specific trends in long-term survival in a register-based cohort of patients  
8 aged 25–54 years hospitalized with a first AMI during 1987–2006, and compared death rates  
9 for men and women separately with those of the general population.  
10  
11  
12  
13  
14  
15  
16  
17  
18  
19

## 20 **METHODS**

### 21 **Registries and study population**

22  
23 Sweden has a publicly financed health care system, with some health care facilities privately  
24 run but still fully integrated into the health care system. The Swedish National Inpatient  
25 Register (IPR), has established complete national coverage since 1987. One study stated that  
26 positive predictive values (PPV) differ among diagnoses in the IPR, but are generally 85–  
27 95%. PPV for myocardial infarction was about 98-100% and the sensitivity was 77-91.5%.<sup>13</sup>  
28 Another validation study concluded that the accuracy of correct diagnosis in AMI was 86 %  
29 regardless (1987-1995) of age and gender.<sup>14</sup> More recent data are lacking. Diagnoses in the  
30 IPR are coded according to the Swedish International Classification of Diseases (ICD) system  
31 (ICD 8th revision until 1986, 9th revision until 1996, and 10th revision thereafter). In the  
32 present study, data from the IPR and the Swedish Cause of Death Register were linked  
33 through personal identity numbers unique to each Swedish citizen. The Cause of Death  
34 Register is based on diagnosis from death certificates. In 2008, 0.8% of death certificates  
35 were missing or insufficient (2.7%)<sup>15</sup>. Validity for a correct diagnosis of ischemic heart  
36 disease in the general population in 1995 was 87%.<sup>16</sup>  
37  
38  
39  
40  
41  
42  
43  
44  
45  
46  
47  
48  
49  
50  
51  
52  
53  
54  
55  
56  
57  
58  
59  
60

1  
2  
3 The present study included all 38,836 cases (31216 men, 7620 women) in Sweden aged 25–  
4  
5 54 years, discharged from hospital after a first AMI in 1987–2006; AMI was defined as a  
6  
7 principal discharge code according to the ICD -8 : 410 (until 1987), ICD-9: 410 (until 1996)  
8  
9 and ICD-10: I21 (from 1997 onward). After excluding 1,560 cases who died during the first  
10  
11 28 days 1169 men (3.01% of cases) median age; 50, and 391 women (1.01% of cases) median  
12  
13 age; 49.0, 37,276 cases (7,229 women and 30,047 men) with a first AMI remained for  
14  
15 analysis. Data from 1980 onward were used to identify first AMIs only, with a time frame of  
16  
17 7 years throughout, to ensure that AMIs registered each year had the same chance of being  
18  
19 identified as a first AMI. Due to the 7-years time frame, 443 cases were recurrent AMI after  
20  
21 seven years (53 women median age; 52, 390 men median age; 51) Criteria for a diagnosis of  
22  
23 AMI in Sweden have followed established guidelines, changing after the adoption of new  
24  
25 AMI criteria in the year 2000.<sup>17,18</sup> Thus, the characteristics of the AMIs in our analysis  
26  
27 changed during the study period. Use of troponins became standard after the year 2000.  
28  
29  
30  
31  
32  
33

34 Comorbidities were defined by the following main or contributory discharge codes during the  
35  
36 preceding 7 years, including the index hospitalization: diabetes (ICD-9 250; ICD-10 E10–  
37  
38 E14), hypertension (ICD-9 401–405; ICD-10: I10–I15), valvular disease (ICD-9 394–397,  
39  
40 424; ICD-10 I05–I09, I34–I35), congenital heart disease (ICD-9 745–747; ICD-10 Q20–  
41  
42 Q26), stroke (ICD-9 431–434, 436; ICD-10 I61–I64), chronic respiratory disease (ICD-9  
43  
44 490–496; ICD-10 J40–J47), malignancy (ICD-9 140–208; ICD-10 C00–C97), renal failure  
45  
46 (ICD-9 584–586; ICD-10 N17–N19), coronary artery bypass grafting (3067, 3066, 3105,  
47  
48 3127, FNA, FNB, FNE, FNC), and percutaneous coronary intervention (3080, FNG 00, FNG  
49  
50 02, FNG 05).  
51  
52  
53  
54  
55

## 56 **Follow-up**

57  
58  
59  
60

1  
2  
3 We analysed 4-year all-cause mortality for four 5-year periods (1987–1991, 1992–1996,  
4 1997–2001, and 2002–2006) through the Swedish Cause of Death Register. The following  
5 codes were used for assignment of causes of death among fatal cases: CVD, (390–459, I00–  
6 I99), ischaemic heart disease (IHD) (410–414, I20–I25, stroke (430–438, I60–I68), and all  
7 other causes (including malignancies; 140-208, C00-C97).  
8  
9  
10  
11  
12

### 13 14 15 16 **Statistical analysis**

17  
18 Statistical analyses were performed with SAS 9.3, (R version 2.15.1 to obtain the graphs). For  
19 comorbidities,  $\chi^2$  tests were used to evaluate differences between men and women and for  
20 trends; a P-value of  $\leq 0.05$  was considered significant. To compare mean age within the  
21 respective age groups, t-tests were performed.  
22  
23  
24  
25  
26  
27  
28

29  
30 Standardized mortality ratios (SMR) with 95% confidence intervals (CIs) were calculated as  
31 the ratio of the observed to expected number of deaths, for 4-year follow up by each period  
32 ,estimated from rates in the general Swedish population, by gender, age and calendar year,  
33 using life expectancy tables from Official Statistics of Sweden (SCB).  
34  
35  
36  
37  
38  
39

40  
41 To examine the excess mortality risk in the study population the absolute risk (AR) was  
42 calculated separately for both the general population and the study population by dividing the  
43 observed mortality with person time. This yields an average annual excess risk for each  
44 period. The absolute excess risk (AER) is the difference between the observed and the  
45 expected AR. For standardization purposes, the estimates were then multiplied by 100 person-  
46 years. The AER calculations add a useful measure of excess risk in absolute terms. Life  
47 expectancy tables from Official Statistics of Sweden (SCB) were used to calculate the  
48 expected mortality in the Swedish general population by gender, age and calendar year.  
49  
50  
51  
52  
53  
54  
55  
56  
57  
58  
59  
60

Cox proportional hazard regression, providing hazard ratios (HR) with 95% CIs, was used to estimate age, and gender-specific changes in all-cause mortality over time.<sup>19</sup> The first period (1987–1991) was used as reference; The multivariable models were adjusted for age, diabetes, hypertension, valvular and congenital heart disease, stroke, chronic respiratory disease, malignancy and renal failure. Furthermore, in the final model the periods were also tested for proportionality by interactions of age, time and with significant comorbidities only (men 45–54; malignancies, women, 45–54; chronic respiratory disease).

The Kaplan-Meier method was used to estimate the survival probability. The proportionality assumption of Cox regression was tested by including interactions between covariates (age, gender, and period) with time; neither interaction test was statistically significant.<sup>20</sup> A log-rank test was conducted to study changes in survival between the time periods.

## RESULTS

Of the 37,276 cases in the study, 7,905 (21.2%) were aged 25–44 years (19.6% women) and 29,371 (78.8%) were aged 44–54 years (19.3% women). Other than diabetes and hypertension (11% for both), this population had few diagnosed comorbidities (Table 1). Women had more diabetes, hypertension, chronic lower respiratory disease and malignancies than did men ( $P < 0.0001$ ).

**Table 1. Baseline characteristics in 37,276 men and women aged <55 years with a first AMI, 1987–2006**

|  | All | Men | Women | P-value |
|--|-----|-----|-------|---------|
|--|-----|-----|-------|---------|

| <b>Number of cases</b>                          | 37 276       | 30 047        | 7 229        |         |
|-------------------------------------------------|--------------|---------------|--------------|---------|
| <b>Age 25-44, n (%)</b>                         | 7 905 (21.2) | 6 357 (21.2)  | 1 548 (21.4) |         |
| <b>Mean age (SD)</b>                            |              | 40.21 (3.74)  | 39.84 (4.04) | 0.055   |
| <b>Age 44-54, n (%)</b>                         | 29 371(78.8) | 23 690 (78.8) | 5 681 (78.6) |         |
| <b>Mean age (SD)</b>                            |              | 50.31 (2.75)  | 50.39 (2.76) | 0.0549  |
| <b>Diabetes, n (%)</b>                          | 4 064 (10.9) | 3 017 (10.0)  | 1 047 (14.5) | <0.0001 |
| <b>Hypertension, n (%)</b>                      | 4110 (11.0)  | 3141 (10.6)   | 969 (13.4)   | <0.0001 |
| <b>Valvular disease, n (%)</b>                  | 287 (0.77)   | 211 (0.70)    | 76 (1.05)    | 0.0023  |
| <b>Congenital heart disease</b>                 | 36 (0.10)    | 23 (0.08)     | 13 (0.18)    | 0.0111  |
| <b>Stroke, n (%)</b>                            | 412 (1.11)   | 302 (1.01)    | 110 (1.52)   | 0.0002  |
| <b>Chronic lower respiratory disease, n (%)</b> | 557(1.49)    | 368 (1.22)    | 189 (2.61)   | <0.0001 |
| <b>Malignancy, n (%)</b>                        | 354 (0.95)   | 255 (0.85)    | 99 (1.37)    | <0.0001 |
| <b>Renal failure</b>                            | 230 (0.62)   | 164 (0.55)    | 66 (0.91)    | 0.0003  |
| <b>CABG*, n (%)</b>                             | 253 (0.68)   | 221 (0.74)    | 32 (0.44)    | 0.007   |
| <b>PCI*, n (%)</b>                              | 235 (0.63)   | 198 (0.66)    | 37 (0.51)    | 0.16    |

\*Procedures dating at least 6 months prior to hospitalization for AMI

AMI, acute myocardial infarction; CABG, coronary artery bypass grafting; PCI, percutaneous coronary intervention

Supplementary Table 1 shows the comorbidities for each 4-year period. All comorbidities except for congenital heart diseases increased significantly over time. Diabetes and hypertension were the most prevalent comorbidities in both men and women but the rates of other comorbidities remained low even in the last period (<4%).

1  
2  
3 During the study period (1987-2006) annual rate per 100.000 population in men and women  
4 aged 25-54 years surviving a first AMI for at least 28 days decreased from 92.3 per 100.000  
5 in 1987 to 72.1 in 2006 (Figure 1). Women, on the other hand, showed a different pattern with  
6 an increase from 17.4 per 100.000 in 1987 to 22.3 in 2006 (p for men <0.0001, for women  
7 0.0003).

8  
9  
10  
11  
12  
13  
14  
15  
16 Survival in men improved continuously over the four 5-year periods (Figure 2), while the  
17 prognosis in women improved until the third period (1997-2001), then reverted to a risk  
18 nearly identical to that in the second period (Figure 3).

19  
20  
21  
22  
23  
24  
25 Table 2 shows mortality by sex, age group, and period. For men aged 25–44 years, the annual  
26 excess risk of dying decreased continuously from 1.38 to 0.50 deaths per 100 person-years  
27 from the first to last period, with an SMR of 4.34 (95% CI: 3.04–5.87) during the last 5-year  
28 period. Corresponding figures for men aged 45–54 were a decrease from 1.53 to 0.59 with a  
29 SMR of 2.43 (95% CI: 2.12–2.76) in the last period (2002–2006). Women displayed more  
30 complicated trends, starting from higher absolute risks of dying compared with men,  
31 decreasing sharply until a nadir in 1997–2001, and then increasing to 1.17 and 1.45 deaths per  
32 100 person-years in women aged 25–44 and 45–54, respectively, in the last period. This was  
33 more than twice the risk in men of the corresponding age groups. Very high SMRs were  
34 noted, particularly for the youngest women, at 13.53 (95% CI: 8.36–19.93) in the last period  
35 and 6.42 (5.24–7.73) in women aged 45–54 years.

36  
37  
38  
39  
40  
41  
42  
43  
44  
45  
46  
47  
48  
49  
50  
51  
52 In men aged 25–44 years, the mortality risk decreased by 70% during the study period  
53 (multivariable adjusted HR: 0.30, 95% CI: 0.20–0.44). A similar decrease was seen in men  
54 aged 45–54 years (multivariable adjusted HR: 0.32, 95% CI: 0.27–0.38). Women aged 25–44  
55  
56  
57  
58  
59  
60

1  
2  
3 years had an overall decline in mortality risk of approximately 50% (multivariable adjusted  
4  
5 HR: 0.47, 95% CI: 0.27–0.83). No significant decrease in mortality risk in the last, compared  
6  
7 with the first period was observed in women aged 45–54 years (age-adjusted HR: 0.77, 95%  
8  
9 CI: 0.59–1.02), but after adjustment for comorbidities there was a significant decrease in risk  
10  
11 (HR: 0.53, 95% CI: 0.39–0.71).  
12  
13  
14  
15  
16  
17  
18  
19  
20  
21  
22  
23  
24  
25  
26  
27  
28  
29  
30  
31  
32  
33  
34  
35  
36  
37  
38  
39  
40  
41  
42  
43  
44  
45  
46  
47  
48  
49  
50  
51  
52  
53  
54  
55  
56  
57  
58  
59  
60

For peer review only



**Table 2. Observed versus expected mortality ratio, estimated over 4 years, standardized mortality ratio, absolute risk, absolute excess risk, and hazard ratio for mortality by age group and period among 37,276 men and women aged <55 years with a first AMI.**

| Age, Period      | Observed <sup>a</sup> | Expected <sup>b</sup> | SMR (95% CI)     | AR <sup>c</sup> | AER <sup>d</sup> | HR (95% CI) <sup>e</sup> | HR (95% CI) <sup>f</sup> |
|------------------|-----------------------|-----------------------|------------------|-----------------|------------------|--------------------------|--------------------------|
| <b>Men 25-44</b> |                       |                       |                  |                 |                  |                          |                          |
| 1987-1991        | 113                   | 16                    | 6.88 (5.67–8.20) | 1.61            | 1.38             | 1.0 (ref)                | 1.0 (ref)                |
| 1992-1996        | 81                    | 13                    | 6.16 (4.89–7.57) | 1.25            | 1.05             | 0.76 (0.57–1.01)         | 0.73 (0.55–0.98)         |
| 1997-2001        | 58                    | 10                    | 5.70 (4.33–7.27) | 1.00            | 0.83             | 0.60 (0.43–0.82)         | 0.53 (0.38–0.73)         |
| 2002-2006        | 36                    | 8                     | 4.34 (3.04–5.87) | 0.65            | 0.50             | 0.41(0.28–0.60)          | 0.30 (0.20–0.44)         |
| <b>Men 45-54</b> |                       |                       |                  |                 |                  |                          |                          |
| 1987-1991        | 465                   | 125                   | 3.72 (3.39–4.07) | 2.10            | 1.53             | 1.0 (ref)                | 1.0 (ref) <sup>g</sup>   |
| 1992-1996        | 379                   | 119                   | 3.20 (2.88–3.53) | 1.56            | 1.07             | 0.74 (0.65–0.85)         | 0.70 (0.61–0.81)         |

|    |  |                    |     |     |                     |      |      |                  |                        |
|----|--|--------------------|-----|-----|---------------------|------|------|------------------|------------------------|
| 1  |  |                    |     |     |                     |      |      |                  |                        |
| 2  |  |                    |     |     |                     |      |      |                  |                        |
| 3  |  |                    |     |     |                     |      |      |                  |                        |
| 4  |  |                    |     |     |                     |      |      |                  |                        |
| 5  |  | 1997-2001          | 289 | 108 | 2.69 (2.39–3.00)    | 1.22 | 0.77 | 0.57 (0.49–0.66) | 0.50 (0.43–0.58)       |
| 6  |  |                    |     |     |                     |      |      |                  |                        |
| 7  |  |                    |     |     |                     |      |      |                  |                        |
| 8  |  | 2002-2006          | 215 | 89  | 2.43 (2.12–2.76)    | 0.99 | 0.59 | 0.47 (0.40–0.56) | 0.32 (0.27–0.39)       |
| 9  |  |                    |     |     |                     |      |      |                  |                        |
| 10 |  |                    |     |     |                     |      |      |                  |                        |
| 11 |  | <b>Women 25-44</b> |     |     |                     |      |      |                  |                        |
| 12 |  |                    |     |     |                     |      |      |                  |                        |
| 13 |  |                    |     |     |                     |      |      |                  |                        |
| 14 |  | 1987-1991          | 34  | 2   | 17.55 (12.15–23.94) | 2.39 | 2.26 | 1.0 (ref)        | 1.0 (ref)              |
| 15 |  |                    |     |     |                     |      |      |                  |                        |
| 16 |  |                    |     |     |                     |      |      |                  |                        |
| 17 |  | 1992-1996          | 28  | 2   | 17.99 (11.95–25.27) | 2.17 | 2.05 | 0.93 (0.56–1.55) | 0.85 (0.51–1.42)       |
| 18 |  |                    |     |     |                     |      |      |                  |                        |
| 19 |  |                    |     |     |                     |      |      |                  |                        |
| 20 |  | 1997-2001          | 10  | 2   | 6.07 (2.89–10.42)   | 0.63 | 0.52 | 0.27 (0.13–0.55) | 0.28 (0.14–0.56)       |
| 21 |  |                    |     |     |                     |      |      |                  |                        |
| 22 |  |                    |     |     |                     |      |      |                  |                        |
| 23 |  | 2002-2006          | 21  | 2   | 13.53 (8.36–19.93)  | 1.26 | 1.17 | 0.55 (0.32–0.94) | 0.47(0.27–0.83)        |
| 24 |  |                    |     |     |                     |      |      |                  |                        |
| 25 |  |                    |     |     |                     |      |      |                  |                        |
| 26 |  | <b>Women 45-54</b> |     |     |                     |      |      |                  |                        |
| 27 |  |                    |     |     |                     |      |      |                  |                        |
| 28 |  |                    |     |     |                     |      |      |                  |                        |
| 29 |  | 1987-1991          | 101 | 15  | 6.90 (5.62–8.31)    | 2.25 | 1.93 | 1.0 (ref)        | 1.0 (ref) <sup>h</sup> |
| 30 |  |                    |     |     |                     |      |      |                  |                        |
| 31 |  |                    |     |     |                     |      |      |                  |                        |
| 32 |  | 1992-1996          | 76  | 16  | 4.63 (3.65–5.73)    | 1.45 | 1.14 | 0.64 (0.48–0.87) | 0.56 (0.42–0.76)       |
| 33 |  |                    |     |     |                     |      |      |                  |                        |
| 34 |  |                    |     |     |                     |      |      |                  |                        |
| 35 |  | 1997-2001          | 68  | 19  | 3.58 (2.78–4.48)    | 1.08 | 0.78 | 0.49 (0.36–0.66) | 0.44 (0.32–0.60)       |
| 36 |  |                    |     |     |                     |      |      |                  |                        |
| 37 |  |                    |     |     |                     |      |      |                  |                        |
| 38 |  | 2002-2006          | 102 | 16  | 6.42 (5.24–7.73)    | 1.72 | 1.45 | 0.77 (0.59–1.02) | 0.53 (0.39–0.71)       |
| 39 |  |                    |     |     |                     |      |      |                  |                        |
| 40 |  |                    |     |     |                     |      |      |                  |                        |
| 41 |  |                    |     |     |                     |      |      |                  |                        |
| 42 |  |                    |     |     |                     |      |      |                  |                        |
| 43 |  |                    |     |     |                     |      |      |                  |                        |
| 44 |  |                    |     |     |                     |      |      |                  |                        |
| 45 |  |                    |     |     |                     |      |      |                  |                        |
| 46 |  |                    |     |     |                     |      |      |                  |                        |
| 47 |  |                    |     |     |                     |      |      |                  |                        |
| 48 |  |                    |     |     |                     |      |      |                  |                        |
| 49 |  |                    |     |     |                     |      |      |                  |                        |

1  
2  
3  
4  
5 <sup>a</sup>Observed number of deaths in the study population, <sup>b</sup>Expected number of deaths in the general population, <sup>c</sup>Absolute risk per 100 person-years,  
6  
7 <sup>d</sup>Absolute excess risk per 100 person-years, <sup>e</sup> Age adjusted, <sup>f</sup> Multiadjusted for age, diabetes, hypertension, valvular, congenital heart disease,  
8  
9 stroke, chronic respiratory disease, malignancy and renal failure. Adjusted for changes and interaction over time, malignancy (<sup>g</sup>), chronic  
10  
11 respiratory disease (<sup>h</sup>).  
12  
13 AMI, acute myocardial infarction; SMR, standardized mortality ratio; AR, absolute risk; AER, absolute excess risk; HR, hazard ratio; CI,  
14  
15 confidence interval  
16  
17  
18  
19  
20  
21  
22  
23  
24  
25  
26  
27  
28  
29  
30  
31  
32  
33  
34  
35  
36  
37  
38  
39  
40  
41  
42  
43  
44  
45  
46  
47  
48  
49

Table 3 shows causes of death for the 2,076 deaths that occurred within 4 years in this cohort. In 1987–1991, 74.8% of all deaths within 4 years were due to CVD (78.6% for men and 58.5% for women) with a majority to IHD. However, during the last period (2002–2006), only 48.4% of all deaths were due to CVD (55.4% for men and, notably, only 34.1% for women)

**Table 3: Cause of death by period for 2,076 deaths within 4 years among men and women aged <55 years with a first AMI during 1987–2006**

| Cause of death          | Total<br>n (%) | Men<br>n (%) | Women<br>n (%) | p-value |
|-------------------------|----------------|--------------|----------------|---------|
| <b>1987-1991</b>        | 713            | 578 (81.1)   | 135 (18.9)     |         |
| <b>CVD</b>              | 533(74.8)      | 454(78.6)    | 79 (58.5)      | <.0001  |
| <b>IHD</b>              | 481 (67.5)     | 405 (70.1)   | 76 (56.3)      | 0.0021  |
| <b>Stroke</b>           | 18 (2.52)      | 16(2.77)     | 2 (1.48)       | 0.3909  |
| <b>All other causes</b> | 180 (25.3)     | 124 (21.5)   | 56 (41.5)      | <.0001  |
| <b>Malignancies</b>     | 55 (7.71)      | 39 (6.75)    | 16 (11.9)      | 0.0454  |
| <b>1992-1996</b>        | 564            | 460 (81.6)   | 104 (18.4)     |         |
| <b>CVD</b>              | 369 (65.4)     | 318 (69.1)   | 51 (49.0)      | <.0001  |
| <b>IHD</b>              | 337 (59.8)     | 295 (64.1)   | 42 (40.4)      | <.0001  |
| <b>Stroke</b>           | 6 (1.06)       | 5 (1.09)     | 1 (0.96)       | 0.9104  |
| <b>All other causes</b> | 195 (34.6)     | 142 (30.9)   | 53 (51.0)      | <.0001  |
| <b>Malignancies</b>     | 79 (14.01)     | 57 (12.4)    | 22 (21.2)      | 0.0201  |
| <b>1997-2001</b>        | 425            | 347 (81.7)   | 78 (18.4)      |         |
| <b>CVD</b>              | 242 (56.9)     | 205 (59.1)   | 37 (47.4)      | 0.0606  |
| <b>IHD</b>              | 216 (50.8)     | 182 (52.5)   | 34 (43.6)      | 0.1573  |
| <b>Stroke</b>           | 5 (1.18)       | 3 (0.86)     | 2 (2.56)       | 0.2084  |

|                         |            |            |            |         |
|-------------------------|------------|------------|------------|---------|
| <b>All other causes</b> | 183 (43.1) | 142 (40.9) | 41 (52.6)  | 0.0606  |
| <b>Malignancies</b>     | 63 (14.8)  | 52(15.0)   | 11 (14.1)  | 0.8428  |
| <b>2002-2006</b>        | 374        | 251 (67.1) | 123 (32.9) |         |
| <b>CVD</b>              | 181 (48.4) | 139 (55.4) | 42 (34.1)  | 0.0001  |
| <b>IHD</b>              | 145 (38.8) | 116 (46.2) | 29 (23.6)  | <0.0001 |
| <b>Stroke</b>           | 12 (3.21)  | 7 (2.79)   | 5 (4.07)   | 0.5106  |
| <b>All other causes</b> | 193 (51.6) | 112 (44.6) | 81(65.9)   | 0.00001 |
| <b>Malignancies</b>     | 60 (16.0)  | 28 (11.2)  | 32 (26.0)  | 0.0002  |

AMI, acute myocardial infarction; IHD, ischaemic heart disease; CVD, cardiovascular disease

## DISCUSSION

The present study showed that young male survivors of AMI have low absolute long-term mortality rates; however, these rates remain between 2- and 4-fold those of the general population. After a favourable development in younger women until 2001, when new criteria for AMI were adopted and troponins became standard, women had higher absolute mortality than men in the last period and showed a dramatically higher risk of death than healthy women. However, fewer than half of all deaths in women were due to CVD in the last period.

Few studies have specifically investigated long-term outcomes in young patients with AMI. One Swedish study based on the Register of Information and Knowledge about Swedish Heart Intensive Care Admissions (RIKS-HIA)<sup>21</sup> investigated all consecutive patients younger than 46 years treated for ST-elevation myocardial infarction (STEMI) in Sweden, 1995–2006 (1,748 men, 384 women). Long-term annual mortality was around 1% with no difference between men and women, similar to our study. Accordingly, in absolute terms and consistent

1  
2  
3 with prior publications from our group,<sup>1</sup> annual mortality rates in AMI survivors younger than  
4  
5 55 years are estimated at about 1%. This is in contrast to older patients in Sweden, among  
6  
7 whom annual mortality rates are about 6% for those aged 65–74 years and more than 12%  
8  
9 among patients aged 75–84 years).<sup>1</sup> The current low absolute mortality figures are a vast  
10  
11 improvement on prior estimates. In a retrospective analysis of 23 published studies from the  
12  
13 prethrombolytic era, the annual death rate after the first year in patients with a first AMI was  
14  
15 5% regardless of age or gender.<sup>22</sup> In the late 1980s, the annual mortality for patients younger  
16  
17 than 55 years was about 2%.<sup>1</sup>  
18  
19

20  
21  
22  
23 There are several reasons for the observed decrease in mortality in younger patients with  
24  
25 AMI. First, several pharmacological and coronary interventions were developed and  
26  
27 implemented during the study period. Nauta et al 2013 showed that patient <55 received  
28  
29 evidence-based medical care and reperfusion to a greater extent than elderly patients.<sup>12</sup>  
30  
31 Second, some of the decrease is likely due to changes in diagnostic criteria during the study  
32  
33 period, as well as more sensitive methods.<sup>17,23</sup> This may imply that less severe AMIs are  
34  
35 detected, with improved survival, but less specificity, as evidenced by increased comorbidities  
36  
37 over time and a higher proportion of non-CVD deaths in the last period. Third, there have  
38  
39 been changes in clinical presentation, with less severe infarctions,<sup>24,25</sup> and fewer STEMIs.<sup>26</sup>  
40  
41 Factors that affect the risk of developing STEMI rather than non-STEMI include smoking<sup>26</sup>  
42  
43 and cardioprotective medications that lower the risk.<sup>27</sup> Declining smoking rates and more  
44  
45 medications used in primary prevention could thus have contributed to milder infarctions and  
46  
47 better survival. Comorbidities increased during the study period. However, this can probably  
48  
49 at least partly be derived to improvements in clinical reporting due to financial incitements.<sup>13</sup>  
50  
51  
52 The striking increase in hypertension can also probably be attributed to changes in criteria and  
53  
54 guidelines management by the WHO.<sup>28</sup>  
55  
56  
57  
58  
59  
60

1  
2  
3  
4  
5 There was a continuous decrease in case fatality among men; however, rates in women did  
6  
7 not follow the same pattern as in men. Mortality in women decreased until the third period  
8  
9 and then increased during the fourth period to nearly the same level as in the second period.  
10  
11 This may have been due to chance because the numbers were limited. However, it could also  
12  
13 reflect differences in diagnostics. With increasing use of troponins, the rate of detection has  
14  
15 increased, and this effect could be stronger for women than for men. In a study that  
16  
17 simultaneously measured CK-MB and troponin,<sup>29</sup> a 64% and 95% increase in the AMI rate  
18  
19 among men and women, respectively, was observed when using troponins. Accordingly, the  
20  
21 increasing mortality among women hospitalized in 2002–2006 could be due to the capture of  
22  
23 other and more complicated types of myocardial damage because an increase in troponin  
24  
25 levels is also seen in other conditions.<sup>30</sup> Even so, comorbidities, although increasing over  
26  
27 time, were still low in the most recent period. Since the most marked change between the  
28  
29 third and the fourth period of our study was the change from CK-MB to troponins as the  
30  
31 predominant marker for myocardial damage, we speculate that the additional AMIs captured  
32  
33 by this more sensitive method are clinically different, not only in being smaller but also to an  
34  
35 unknown extent reflecting myocardial damage not due to atherosclerotic disease.  
36  
37 Circumstantial evidence for this might be derived from the increasing and much higher  
38  
39 proportion of non-CVD deaths, as well as more comorbidities, in women compared to men  
40  
41 over the study period. In the present study the results showed an increased rate of survivors  
42  
43 but a decreasing trend in death in CVD among young women. These results strengthen that  
44  
45 the increased all-cause mortality is likely a result of a combination between the use of  
46  
47 troponin and increasing comorbidities.  
48  
49  
50  
51  
52  
53  
54  
55  
56  
57  
58  
59  
60

1  
2  
3 Few studies have compared mortality rates in young patients with AMI with those in the  
4  
5 general population. A record linkage of hospital and mortality data identified 387,452  
6  
7 individuals in England, hospitalized with a main diagnosis of AMI in 2004–2010 and who  
8  
9 survived at least 30 days.<sup>7</sup> Long-term risk of death of any cause among survivors of a first  
10  
11 AMI was twice that in the English general population of equivalent age, highest among  
12  
13 younger patients aged 55–64 years (about 2- to 3-fold for men and women, respectively), and  
14  
15 approached the mortality rate of the general population for those aged 85 years or more.  
16  
17 Estimates for individuals younger than 55 years were not stated in the study by Smolina, et  
18  
19 al., but we have since been provided with information that mortality ratios were 2.6 for men  
20  
21 and 5.6 for women aged 30–54 years after 4 years, which is more or less comparable to our  
22  
23 findings (Smolina K, personal communication). For the period corresponding to that in the  
24  
25 study by Smolina et al.<sup>7</sup> we found mortality ratios of 4.3 and 2.4 for men aged 25–44 and 45–  
26  
27 54 years, respectively. For women aged 25–44 years, the estimated mortality ratio was 13.5,  
28  
29 but this was based on very few cases (about four deaths per year). The estimate of 6.4 for  
30  
31 women aged 45–54 years should be more reliable. It should be noted that women in the  
32  
33 general population in this age range have very low mortality rates, which partially explains  
34  
35 the high SMRs in women.  
36  
37  
38  
39  
40  
41  
42

43 The main limitation in the present study is the reliance on administrative registers with no  
44  
45 details of changes in several characteristics, such as biomarkers, electrocardiographic  
46  
47 findings, smoking, medication, hyperlipidemia, family history, ethnicity and socioeconomic  
48  
49 status and a lack of other clinical information, notably hospital treatment and clinical  
50  
51 presentation. Also, we were unable to apply uniform criteria for diagnosis over time. This  
52  
53 limits considerably the interpretation that can be made, however, the findings should be  
54  
55 applicable to current patients with AMI in an industrialized modern country. The quality of  
56  
57  
58  
59  
60



1  
2  
3 the data is obviously of fundamental importance, but validation studies of the IPR indicate  
4 reasonable accuracy.<sup>13,14</sup> Incorrect death certificates could lead to uncertainty with respect to  
5 attributing cause of death<sup>15</sup>, but IHD diagnoses has been estimated to be correct in 87% for  
6 ischemic heart disease although the data from this study were collected two decades ago.<sup>16</sup>  
7  
8 The causes of death are also considered to be more reliable for the younger population than  
9 for the elderly population.<sup>15</sup>  
10  
11  
12  
13  
14  
15  
16  
17

18 The strengths of the study include nationwide coverage with virtually no loss to follow-up and  
19 the large sample size. Given the low mortality in absolute terms, larger populations are  
20 needed, particularly for women, because they constitute less than 20% of the AMI population  
21 younger than 55 years.  
22  
23  
24  
25  
26  
27  
28

## 29 **Conclusions**

30  
31  
32 These data extend and update what is currently known about sex-specific absolute and relative  
33 survival in patients with AMI younger than 55 years, with a large population of more than  
34 35,000 cases during a 20-year period. Among patients surviving for 28 days after AMI, the  
35 annual mortality rates are now comparatively low at approximately 1%. Given the much  
36 lower mortality in this age group in the general population, young survivors of AMI,  
37 particularly women, remain at a much higher risk of death, much of this, however, due to non-  
38 CVD causes. Accordingly, while mortality is low in absolute terms, younger women with  
39 AMI lose the survival advantage women normally have over men. Additional strategies to  
40 bring mortality closer to that which would be expected for this age group are needed, in  
41 particular for women.  
42  
43  
44  
45  
46  
47  
48  
49  
50  
51  
52  
53  
54  
55  
56  
57  
58  
59  
60

**Funding**

This work was supported by the Swedish Research Council [grant number VR 521-2010-2984]; the Swedish Heart-Lung Foundation [grant number 2012-0325]; and the Swedish Council for Working Life and Social Research [grant number Epilife 2006-1506], the VGR region and the Swedish state under the ALF-LUA agreement.

**Contributors**

Study concept, design: SN, AR, LB, JB, KWG. Analysis and interpretation of data: SN, TZS, AR, LB, JB, KWG. Drafting and revised the manuscript: SN, LB, JB, KWG, TZS, KF, SM, AR. Critical revision of the final version of the manuscript: all authors. SN, LB, JB, KWG, TZS, KF, SM, AR. Guarantor: AR

**Competing interests:**

None declared.

**Data sharing statement**

No additional data are available.

**Ethical approval**

All personal identifiers were removed and replaced with a sequential number in the final data set. The protocol was approved by the regional Ethics Board of Gothenburg.

**Provenance and peer review**

Not commissioned; externally peer reviewed.

## REFERENCES

1. Dudas K, Lappas G, Rosengren A. Long-term prognosis after hospital admission for acute myocardial infarction from 1987 to 2006. *Int J Cardiol* 2012;**155**:400-405.
2. Langorgen J, Iglund J, Vollset SE, *et al*. Short-term and long-term case fatality in 11 878 patients hospitalized with a first acute myocardial infarction, 1979-2001: the Western Norway cardiovascular registry. *Eur J Cardiovasc Prev Rehabil* 2009;**16**:621-627.
3. Hardoon SL, Whincup PH, Petersen I, *et al*. Trends in longer-term survival following an acute myocardial infarction and prescribing of evidenced-based medications in primary care in the UK from 1991: a longitudinal population-based study. *J Epidemiol Community Health* 2011;**65**:770-774.
4. Rayner M, Allender S, Scarborough P. Cardiovascular disease in Europe. *Eur J Cardiovasc Prev Rehabil* 2009;**16 Suppl 2**:S43-S47.
5. Nichols MTN, Scarborough P, Luengo-Fernandez R, *et al*. *European Cardiovascular Disease Statistics 2012*. European Heart Network, Brussels, European Society of Cardiology, Sophia Antipolis; 2012.
6. Fagring AJ, Lappas G, Kjellgren KI, *et.al*. Twenty-year trends in incidence and 1-year mortality in Swedish patients hospitalised with non-AMI chest pain. Data from 1987-2006 from the Swedish hospital and death registries. *Heart* 2010;**96**:1043-1049.
7. Smolina K, Wright FL, Rayner M, *et al*. Long-term survival and recurrence after acute myocardial infarction in England, 2004 to 2010. *Circ Cardiovasc Qual Outcomes* 2012;**5**:532-540.

- 1  
2  
3 8. Gale CP, Cattle B, Woolston A, *et al.* Resolving inequalities in care? Reduced  
4 mortality in the elderly after acute coronary syndromes. The Myocardial Ischaemia  
5 National Audit Project 2003-2010. *Eur Heart J* 2012;**33**:630-639.  
6  
7  
8  
9  
10 9. Rosengren A, Spetz CL, Koster M, *et al.* Sex differences in survival after myocardial  
11 infarction in Sweden; data from the Swedish National Acute Myocardial Infarction  
12 Register. *Eur Heart J* 2001;**22**:314-322.  
13  
14  
15  
16 10. Vaccarino V, Krumholz HM, Yarzebski J, *et al.* Sex differences in 2-year mortality  
17 after hospital discharge for myocardial infarction. *Ann Intern Med* 2001;**134**:173-181.  
18  
19  
20  
21 11. Nauta ST, Deckers JW, van Domburg RT, *et al.* Sex-related trends in mortality in  
22 hospitalized men and women after myocardial infarction between 1985 and 2008:  
23 equal benefit for women and men. *Circulation* 2012;**126**:2184-2189.  
24  
25  
26  
27 12. Nauta ST, Decker JW, Akkerhuis KM, *et al.* Age-dependent care and long-term (20  
28 year) mortality of 14,434 myocardial infarction patients: Changes from 1985 to 2008.  
29 *Int. J Cardiol* 2013;**167**:693-697  
30  
31  
32  
33  
34 13. Ludvigsson JF, Andersson E, Ekbom A, *et al.* External review and validation of the  
35 Swedish national inpatient register. *BMC Public Health* 2011;**11**:450.  
36  
37  
38  
39 14. Hammar N, Alfredsson L, Rosen M, *et al.* A national record linkage to study acute  
40 myocardial infarction incidence and case fatality in Sweden. *Int J Epidemiol* 2001;**30**  
41 **Suppl 1**:S30-S34.  
42  
43  
44  
45  
46 15. Swedish National Board of Health and Welfare, Cause of death statistics - history,  
47 production methods and reliability. 2010. (*In Swedish*)  
48 <http://www.socialstyrelsen.se/publikationer2010/2010-4-33> (Accessed 16 sept 2013)  
49  
50  
51  
52 16. Johansson LA, Björkenstam C, Westerling R. Unexplained differences between  
53 hospital and mortality data indicated mistakes in death certification: an investigation  
54 of 1,094 deaths in Sweden during 1995. *J Clin Epidemiol* 2009;**62**:1202-1209  
55  
56  
57  
58  
59  
60

- 1  
2  
3 17. Alpert JS, Thygesen K, Antman E, *et al.* Myocardial infarction redefined--a consensus  
4 document of The Joint European Society of Cardiology/American College of  
5 Cardiology Committee for the redefinition of myocardial infarction. *J Am Coll*  
6 *Cardiol* 2000;**36**:959-969.
- 7  
8  
9  
10  
11 18. Tunstall-Pedoe H, Kuulasmaa K, Amouyel P, *et al.* Myocardial infarction and  
12 coronary deaths in the World Health Organization MONICA Project. Registration  
13 procedures, event rates, and case-fatality rates in 38 populations from 21 countries in  
14 four continents. *Circulation* 1994;**90**:583-612.
- 15  
16  
17  
18  
19  
20 19. Cox DR. Regression models and life-tables. *J R Stat Soc Series B Stat Methodol*  
21 1972;**34**:187-220.
- 22  
23  
24  
25 20. Allison PD. *Survival Analysis Using SAS: A Practical Guide*. Cary, NC: SAS  
26 Institute; 2010.
- 27  
28  
29  
30 21. Lawesson SS, Stenestrand U, Lagerqvist B, *et al.* Gender perspective on risk factors,  
31 coronary lesions and long-term outcome in young patients with ST-elevation  
32 myocardial infarction. *Heart* 2010;**96**:453-459.
- 33  
34  
35  
36 22. Law MR, Watt HC, Wald NJ. The underlying risk of death after myocardial infarction  
37 in the absence of treatment. *Arch Intern Med* 2002;**162**:2405-2410.
- 38  
39  
40  
41 23. Parikh NI, Gona P, Larson MG, *et al.* Long-term trends in myocardial infarction  
42 incidence and case fatality in the National Heart, Lung, and Blood Institute's  
43 Framingham Heart study. *Circulation* 2009;**119**:1203-1210.
- 44  
45  
46  
47 24. Myerson M, Coady S, Taylor H, *et al.* Declining severity of myocardial infarction  
48 from 1987 to 2002: the Atherosclerosis Risk in Communities (ARIC) Study.  
49  
50  
51  
52  
53  
54  
55  
56  
57  
58  
59  
60  
*Circulation* 2009;**119**:503-514.

- 1  
2  
3 25. Goff DC Jr, Howard G, Wang CH, *et al.* Trends in severity of hospitalized myocardial  
4 infarction: the atherosclerosis risk in communities (ARIC) study, 1987-1994. *Am*  
5 *Heart J* 2000;**139**:874-880.  
6  
7  
8  
9  
10 26. Bjorck L, Rosengren A, Wallentin L, *et al.* Smoking in relation to ST-segment  
11 elevation acute myocardial infarction: findings from the Register of Information and  
12 Knowledge about Swedish Heart Intensive Care Admissions. *Heart* 2009;**95**:1006-  
13 1011.  
14  
15  
16  
17  
18 27. Bjorck L, Wallentin L, Stenestrand U, *et al.* Medication in relation to ST-segment  
19 elevation myocardial infarction in patients with a first myocardial infarction: Swedish  
20 Register of Information and Knowledge about Swedish Heart Intensive Care  
21 Admissions (RIKS-HIA). *Arch Intern Med* 2010;**170**:1375-1381.  
22  
23  
24  
25  
26  
27 28. World Health Organization, international Society of hypertension Writing Group.  
28 2003 World Health Organization (WHO)/International Society of Hypertension (ISH)  
29 statement on management of hypertension. *J Hypertens* 2003;**21**:1983-1992  
30  
31  
32  
33  
34 29 Luepker RV, Duval S, Jacobs DR Jr, *et al.* The effect of changing diagnostic  
35 algorithms on acute myocardial infarction rates. *Ann Epidemiol* 2011;**21**:824-829.  
36  
37  
38  
39 30. Meier MA, Al-Badr WH, Cooper JV, *et al.* The new definition of myocardial  
40 infarction: diagnostic and prognostic implications in patients with acute coronary  
41 syndromes. *Arch Intern Med* 2002;**162**:1585-1589.  
42  
43  
44  
45  
46  
47  
48  
49  
50  
51  
52  
53  
54  
55  
56  
57  
58  
59  
60

## FIGURE LEGENDS

**Figure 1** Annual rate per 100.000 population in men and women aged 25-54 years surviving a first AMI for at least 28 days.

**Figure 2** Four-year trend in survival probability by period and time among men (n 30 047) aged 25–54 years with a first AMI

**Figure 3** Four-year trend in survival probability by period and time among women (n 7 229) aged 25–54 years with a first AMI

1  
2  
3 **Sex-specific trends in *four-year* survival in 37,276 men and women with**  
4 **acute myocardial infarction before the age of 55 years in Sweden, 1987–**  
5 **2006. *A register-based cohort study.***  
6  
7  
8  
9

10  
11  
12  
13  
14 Nielsen S, MSc<sup>1</sup>, Björck L, PhD<sup>1,2</sup>, Berg J, MD<sup>1</sup>, Giang KW, MSc<sup>1</sup>, Zverkova Sandström T,  
15 BSc<sup>1</sup>, Falk K, PhD<sup>2</sup>, Määttä S, PhD<sup>2</sup>, Rosengren A, MD, PhD<sup>1\*</sup>  
16  
17  
18

19  
20 <sup>1</sup>Department of Molecular and Clinical Medicine and <sup>2</sup>Institute of Health and Care Sciences,  
21 Sahlgrenska Academy, University of Gothenburg, Gothenburg, Sweden  
22  
23  
24

25  
26  
27 \*Corresponding author: Annika Rosengren, Department of Molecular and Clinical Medicine,  
28 Sahlgrenska University Hospital/Östra, SE-41685, Gothenburg, Sweden. E-mail:  
29 annika.rosengren@gu.se; Tel: +46 31343 4086; Fax: +46 31258933  
30  
31  
32  
33  
34  
35  
36  
37

38 **Keywords** Myocardial Infarction • Mortality • Survival • Trends • Epidemiology  
39  
40  
41  
42

43  
44 **Word count:** Abstract: 269  
45

46  
47 Manuscript: 3400  
48  
49  
50  
51  
52  
53  
54  
55  
56  
57  
58  
59  
60



## ABSTRACT

**Objective** To examine sex-specific trends in 4-year mortality among young patients with a first acute myocardial infarction (AMI), 1987–2006.

**Design:** Prospective cohort study

**Setting:** Sweden.

**Participants:** We identified 37,276 cases (19.4% women; age, 25–54 years) from the Swedish Inpatient Register, 1987–2006, who had survived 28 days after an AMI.

**Outcome measures:** Four-year mortality from all causes, and Standard Mortality Ratio (SMR)

**Results** From the first to last 5-year period, the absolute excess risk decreased from 1.38 to 0.50 and 1.53 to 0.59 per 100 person-years among men aged 25–44 and 45–54 years, respectively. Corresponding figures for women were a decrease from 2.26 to 1.17 and from 1.93 to 1.45 per 100 person-years, respectively. Trends for women were non-linear, decreasing to the same extent as those for men until the third period, then increasing. For the last 5-year period, the standardized mortality ratio for young survivors of AMI compared with the general population was 4.34 (95% confidence interval [CI]: 3.04–5.87) and 2.43 (95% CI: 2.12–2.76) for men aged 25–44 and 45–54 years, respectively, and 13.53 (95% CI: 8.36–19.93) and 6.42 (95% CI: 5.24–7.73) for women. Deaths not associated with cardiovascular causes increased from 21.5% to 44.6% in men and 41.5% to 65.9% in women, respectively.

**Conclusion** Young male survivors of AMI have low absolute long-term mortality rates, but these rates remain 2- to 4-fold that of the general population. After favourable development until 2001, women now have higher absolute mortality than men and a 6- to 14-fold risk of death compared with *women in the general population*.

**Strengths and limitations of this study**

- Population-based study, that includes all *cases* with a first AMI, aged 25-55 years, in Sweden during a period of twenty years.
- Strengths include nationwide coverage, and near-complete follow-up.
- The main limitation is that the used register does not provide data covering clinical characteristics or treatment which could have been valuable to estimate their impact on mortality.

## INTRODUCTION

Survival after acute myocardial infarction (AMI) has improved during the last several decades in Sweden and elsewhere.<sup>1-3</sup> Nonetheless, coronary heart disease (CHD) remains a major contributor to morbidity and mortality with more than one in five men and women currently dying from CHD in Europe.<sup>4,5</sup> Survivors of AMI are known to have an impaired prognosis compared with the general population.<sup>6</sup> In a recent study *from England, the long-term* risk of death of any cause among survivors of a first AMI was twice that of the general English population of equivalent age.<sup>7</sup>

Most patients with AMI are elderly; accordingly, most information on long-term survival is based on patients older than 55 years. However, about one in six AMI survivors is younger than 55 years.<sup>8</sup> Knowledge of the prognosis among young patients with AMI is essential because younger patients stand to lose more of their remaining life years compared with older patients. This applies particularly to women because women have a longer life expectancy.

Further, younger, but not older, women hospitalized with AMI have a worse long-term prognosis than men *as shown in analyses of patient populations dating from the 1980s and 1990s.*<sup>9,10</sup> However, there have since been marked changes in treatment, diagnostic criteria, and post-AMI prognosis. A recent study found that reductions in long-term mortality after 1985 were at least as high for women as for men with AMI,<sup>11</sup> but the study did not specifically report findings for young patients. An additional study, found that reductions in mortality were similar regardless of age but that younger patients are more likely to receive evidence based care.<sup>12</sup>

1  
2  
3 Few data sets contain a sufficient number of young patients to reliably estimate risk of death  
4 compared with the general population. In addition, more information is needed about cause-  
5 specific mortality, because an unknown proportion of deaths may not be due to cardiovascular  
6 causes, and will thus be less amenable to coronary preventive measures. In the present study,  
7 we examined sex-specific trends in long-term survival in a register-based cohort of patients  
8 aged 25–54 years hospitalized with a first AMI during 1987–2006, and compared death rates  
9 for men and women separately with those of the general population.  
10  
11  
12  
13  
14  
15  
16  
17  
18  
19

## 20 21 **METHODS**

### 22 23 **Registries and study population**

24  
25 Sweden has a publicly financed health care system, with some health care facilities privately  
26 run but still fully integrated into the health care system. The Swedish National Inpatient  
27 Register (IPR), has established complete national coverage since 1987. *One study stated that*  
28 *positive predictive values (PPV) differ among diagnoses in the IPR, but are generally 85–*  
29 *95%. PPV for myocardial infarction was about 98-100% and the sensitivity was 77-91.5%.<sup>13</sup>*  
30 *Another validation study concluded that the accuracy of correct diagnosis in AMI was 86 %*  
31 *regardless (1987-1995) of age and gender.<sup>14</sup> More recent data are lacking.* Diagnoses in the  
32 IPR are coded according to the Swedish *International Classification of Diseases (ICD)*  
33 *system (ICD 8th revision until 1986, 9th revision until 1996, and 10th revision thereafter).* In  
34 the present study, data from the IPR and the Swedish Cause of Death Register were linked  
35 through personal identity numbers unique to each Swedish citizen. *The Cause of Death*  
36 *Register is based on diagnosis from death certificates. In 2008, 0.8% of death certificates*  
37 *were missing or insufficient (2.7%)<sup>15</sup>. Validity for a correct diagnosis of ischemic heart*  
38 *disease in the general population in 1995 was 87%.<sup>16</sup>*  
39  
40  
41  
42  
43  
44  
45  
46  
47  
48  
49  
50  
51  
52  
53  
54  
55  
56  
57  
58  
59  
60

1  
2  
3 The present study included all 38,836 cases (31216 men, 7620 women) in Sweden aged 25–54  
4 years, discharged from hospital after a first AMI in 1987–2006; AMI was defined as a  
5 principal discharge code according to the ICD -8 : 410 (until 1987), ICD-9: 410 (until 1996)  
6 and ICD-10: I21 (from 1997 onward). After excluding 1,560 cases who died during the first  
7 28 days 1169 men (3.01% of cases) median age; 50, and 391 women (1.01% of cases) median  
8 age; 49.0, 37,276 cases (7,229 women and 30,047 men) with a first AMI remained for  
9 analysis. Data from 1980 onward were used to identify first AMIs only, with a time frame of  
10 7 years throughout, to ensure that AMIs registered each year had the same chance of being  
11 identified as a first AMI. Due to the 7-years time frame, 443 cases were recurrent AMI after  
12 seven years (53 women median age; 52, 390 men median age; 51) Criteria for a diagnosis of  
13 AMI in Sweden have followed established guidelines, changing after the adoption of new  
14 AMI criteria in the year 2000.<sup>17,18</sup> Thus, the characteristics of the AMIs in our analysis  
15 changed during the study period. Use of troponins became standard after the year 2000.  
16  
17  
18  
19  
20  
21  
22  
23  
24  
25  
26  
27  
28  
29  
30  
31  
32  
33

34 Comorbidities were defined by the following main or contributory discharge codes during the  
35 preceding 7 years, including the index hospitalization: diabetes (ICD-9 250; ICD-10 E10–  
36 E14), hypertension (ICD-9 401–405; ICD-10: I10–I15), valvular disease (ICD-9 394–397,  
37 424; ICD-10 I05–I09, I34–I35), congenital heart disease (ICD-9 745–747; ICD-10 Q20–  
38 Q26), stroke (ICD-9 431–434, 436; ICD-10 I61–I64), chronic respiratory disease (ICD-9  
39 490–496; ICD-10 J40–J47), malignancy (ICD-9 140–208; ICD-10 C00–C97), renal failure  
40 (ICD-9 584–586; ICD-10 N17–N19), coronary artery bypass grafting (3067, 3066, 3105,  
41 3127, FNA, FNB, FNE, FNC), and percutaneous coronary intervention (3080, FNG 00, FNG  
42 02, FNG 05).  
43  
44  
45  
46  
47  
48  
49  
50  
51  
52  
53  
54  
55

## 56 Follow-up

57  
58  
59  
60

1  
2  
3 We analysed 4-year all-cause mortality for four 5-year periods (1987–1991, 1992–1996,  
4  
5 1997–2001, and 2002–2006) through the Swedish Cause of Death Register. The following  
6  
7 codes were used for assignment of causes of death among fatal cases: CVD, (390–459, I00–  
8  
9 I99), ischaemic heart disease (IHD) (410–414, I20–I25, stroke (430–438, I60–I68), and all  
10  
11 other causes (including malignancies; 140–208, C00–C97).  
12  
13

### 14 15 16 **Statistical analysis**

17  
18 Statistical analyses were performed with SAS 9.3, (R version 2.15.1 to obtain the graphs). For  
19  
20 comorbidities,  $\chi^2$  tests were used to evaluate differences between men and women and for  
21  
22 trends; a P-value of  $\leq 0.05$  was considered significant. To compare mean age within the  
23  
24 respective age groups, t-tests were performed.  
25  
26  
27

28  
29 Standardized mortality ratios (SMR) with 95% confidence intervals (CIs) were calculated as  
30  
31 the ratio of the observed to expected number of deaths, *for 4-year follow up by each period*  
32  
33 ,estimated from rates in the general Swedish population, by gender, age and calendar year,  
34  
35 using life expectancy tables from Official Statistics of Sweden (SCB).  
36  
37  
38

39  
40 *To examine the excess mortality risk in the study population the absolute risk (AR) was*  
41  
42 *calculated separately for both the general population and the study population by dividing the*  
43  
44 *observed mortality with person time. This yields an average annual excess risk for each*  
45  
46 *period. The absolute excess risk (AER) is the difference between the observed and the*  
47  
48 *expected AR. For standardization purposes, the estimates were then multiplied by 100 person-*  
49  
50 *years. The AER calculations add a useful measure of excess risk in absolute terms. Life*  
51  
52 *expectancy tables from Official Statistics of Sweden (SCB) were used to calculate the*  
53  
54 *expected mortality in the Swedish general population by gender, age and calendar year.*  
55  
56  
57  
58  
59  
60

1  
2  
3  
4  
5 Cox proportional hazard regression, providing hazard ratios (HR) with 95% CIs, was used to  
6  
7 estimate age, and gender-specific changes in all-cause mortality over time.<sup>19</sup> The first period  
8  
9 (1987–1991) was used as reference; The *multivariable* models were adjusted for age,  
10  
11 diabetes, hypertension, valvular and congenital heart disease, stroke, chronic respiratory  
12  
13 disease, malignancy and renal failure. Furthermore, in the final model the periods were also  
14  
15 tested for proportionality by interactions of age, time and with significant comorbidities only  
16  
17 (men 45-54; malignancies, women, 45-54; chronic respiratory disease).  
18  
19

20  
21  
22 The Kaplan-Meier method was used to estimate the survival probability. The proportionality  
23  
24 assumption of Cox regression was tested by including interactions between covariates (age,  
25  
26 *gender*, and period) with time; neither interaction test was statistically significant.<sup>20</sup> A log-  
27  
28 rank test was conducted to study changes in survival between the time periods.  
29  
30  
31

## 32 33 34 RESULTS

35  
36 Of the 37,276 cases in the study, 7,905 (21.2%) were aged 25–44 years (19.6% women) and  
37  
38 29,371 (78.8%) were aged 44–54 years (19.3% women). Other than diabetes and hypertension  
39  
40 (11% for both), this population had few diagnosed comorbidities (Table 1). Women had more  
41  
42 diabetes, hypertension, chronic lower respiratory disease and malignancies than did men ( $P <$   
43  
44 0.0001).  
45  
46  
47  
48  
49

50 **Table 1. Baseline characteristics in 37,276 men and women aged <55 years with a first**  
51  
52 **AMI, 1987–2006**

|  | All | Men | Women | P-value |
|--|-----|-----|-------|---------|
|--|-----|-----|-------|---------|

|                                                 |              |               |              |         |
|-------------------------------------------------|--------------|---------------|--------------|---------|
| <b>Number of cases</b>                          | 37 276       | 30 047        | 7 229        |         |
| <b>Age 25-44, n (%)</b>                         | 7 905 (21.2) | 6 357 (21.2)  | 1 548 (21.4) |         |
| <b>Mean age (SD)</b>                            |              | 40.21 (3.74)  | 39.84 (4.04) | 0.055   |
| <b>Age 44-54, n (%)</b>                         | 29 371(78.8) | 23 690 (78.8) | 5 681 (78.6) |         |
| <b>Mean age (SD)</b>                            |              | 50.31 (2.75)  | 50.39 (2.76) | 0.0549  |
| <b>Diabetes, n (%)</b>                          | 4 064 (10.9) | 3 017 (10.0)  | 1 047 (14.5) | <0.0001 |
| <b>Hypertension, n (%)</b>                      | 4110 (11.0)  | 3141 (10.6)   | 969 (13.4)   | <0.0001 |
| <b>Valvular disease, n (%)</b>                  | 287 (0.77)   | 211 (0.70)    | 76 (1.05)    | 0.0023  |
| <b>Congenital heart disease</b>                 | 36 (0.10)    | 23 (0.08)     | 13 (0.18)    | 0.0111  |
| <b>Stroke, n (%)</b>                            | 412 (1.11)   | 302 (1.01)    | 110 (1.52)   | 0.0002  |
| <b>Chronic lower respiratory disease, n (%)</b> | 557(1.49)    | 368 (1.22)    | 189 (2.61)   | <0.0001 |
| <b>Malignancy, n (%)</b>                        | 354 (0.95)   | 255 (0.85)    | 99 (1.37)    | <0.0001 |
| <b>Renal failure</b>                            | 230 (0.62)   | 164 (0.55)    | 66 (0.91)    | 0.0003  |
| <b>CABG*, n (%)</b>                             | 253 (0.68)   | 221 (0.74)    | 32 (0.44)    | 0.007   |
| <b>PCI*, n (%)</b>                              | 235 (0.63)   | 198 (0.66)    | 37 (0.51)    | 0.16    |

\*Procedures dating at least 6 months prior to hospitalization for AMI

AMI, acute myocardial infarction; CABG, coronary artery bypass grafting; PCI, percutaneous coronary intervention

Supplementary Table 1 shows the comorbidities for each 4-year period. All comorbidities except for congenital heart diseases increased significantly over time. Diabetes and hypertension were the most prevalent comorbidities in both men and women but the rates of other comorbidities remained low even in the last period (<4%).



1  
2  
3 *During the study period (1987-2006) annual rate per 100.000 population in men and women*  
4 *aged 25-54 years surviving a first AMI for at least 28 days decreased from 92.3 per 100.000*  
5 *in 1987 to 72.1 in 2006 (Figure 1). Women, on the other hand, showed a different pattern*  
6 *with an increase from 17.4 per 100.000 in 1987 to 22.3 in 2006 (p for men <0.0001, for*  
7 *women 0.0003).*  
8  
9  
10  
11  
12

13  
14  
15  
16 Survival in men improved continuously over the four 5-year periods (Figure 2), while the  
17 prognosis in women improved until the third period (1997-2001), then reverted to a *risk*  
18 nearly identical to that in the second period (Figure 3).  
19  
20  
21  
22

23  
24  
25 Table 2 shows mortality by sex, age group, and period. For men aged 25–44 years, the annual  
26 excess risk of dying decreased continuously from 1.38 to 0.50 deaths per 100 person-years  
27 from the first to last period, with an SMR of 4.34 (95% CI: 3.04–5.87) during the last 5-year  
28 period. Corresponding figures for men aged 45–54 were a decrease from 1.53 to 0.59 with a  
29 SMR of 2.43 (95% CI: 2.12–2.76) in the last period (2002–2006). Women displayed more  
30 complicated trends, starting from higher absolute risks of dying compared with men,  
31 decreasing sharply until a nadir in 1997–2001, and then increasing to 1.17 and 1.45 deaths per  
32 100 person-years in women aged 25–44 and 45–54, respectively, in the last period. This was  
33 more than twice the risk in men of the corresponding age groups. Very high SMRs were  
34 noted, particularly for the youngest women, at 13.53 (95% CI: 8.36–19.93) in the last period  
35 and 6.42 (5.24–7.73) in women aged 45–54 years.  
36  
37  
38  
39  
40  
41  
42  
43  
44  
45  
46  
47  
48  
49  
50

51  
52 In men aged 25–44 years, the mortality risk decreased by 70% during the study period  
53 (multivariable adjusted HR: 0.30, 95% CI: 0.20–0.44). A similar decrease was seen in men  
54 aged 45–54 years (multivariable adjusted HR: 0.32, 95% CI: 0.27–0.38). Women aged 25–44  
55  
56  
57  
58  
59  
60

1  
2  
3 years had an overall decline in mortality risk of approximately 50% (multivariable adjusted  
4  
5 HR: 0.47, 95% CI: 0.27–0.83). No significant decrease in mortality risk in the last, compared  
6  
7 with the first period was observed in women aged 45–54 years (age-adjusted HR: 0.77, 95%  
8  
9 CI: 0.59–1.02), but after adjustment for comorbidities there was a significant decrease in risk  
10  
11 (HR: 0.53, 95% CI: 0.39–0.71).  
12  
13  
14  
15  
16  
17  
18  
19  
20  
21  
22  
23  
24  
25  
26  
27  
28  
29  
30  
31  
32  
33  
34  
35  
36  
37  
38  
39  
40  
41  
42  
43  
44  
45  
46  
47  
48  
49  
50  
51  
52  
53  
54  
55  
56  
57  
58  
59  
60

For peer review only

**Table 2. Observed versus expected mortality ratio, estimated over 4 years, standardized mortality ratio, absolute risk, absolute excess risk, and hazard ratio for mortality by age group and period among 37,276 men and women aged <55 years with a first AMI.**

| Age, Period      | Observed <sup>a</sup> | Expected <sup>b</sup> | SMR (95% CI)     | AR <sup>c</sup> | AER <sup>d</sup> | HR (95% CI) <sup>e</sup> | HR (95% CI) <sup>f</sup> |
|------------------|-----------------------|-----------------------|------------------|-----------------|------------------|--------------------------|--------------------------|
| <b>Men 25-44</b> |                       |                       |                  |                 |                  |                          |                          |
| 1987-1991        | 113                   | 16                    | 6.88 (5.67–8.20) | 1.61            | 1.38             | 1.0 (ref)                | 1.0 (ref)                |
| 1992-1996        | 81                    | 13                    | 6.16 (4.89–7.57) | 1.25            | 1.05             | 0.76 (0.57–1.01)         | 0.73 (0.55–0.98)         |
| 1997-2001        | 58                    | 10                    | 5.70 (4.33–7.27) | 1.00            | 0.83             | 0.60 (0.43–0.82)         | 0.53 (0.38–0.73)         |
| 2002-2006        | 36                    | 8                     | 4.34 (3.04–5.87) | 0.65            | 0.50             | 0.41(0.28–0.60)          | 0.30 (0.20–0.44)         |
| <b>Men 45-54</b> |                       |                       |                  |                 |                  |                          |                          |
| 1987-1991        | 465                   | 125                   | 3.72 (3.39–4.07) | 2.10            | 1.53             | 1.0 (ref)                | 1.0 (ref) <sup>g</sup>   |
| 1992-1996        | 379                   | 119                   | 3.20 (2.88–3.53) | 1.56            | 1.07             | 0.74 (0.65–0.85)         | 0.70 (0.61–0.81)         |

|    |  |                    |     |     |                     |      |      |                  |                        |
|----|--|--------------------|-----|-----|---------------------|------|------|------------------|------------------------|
| 1  |  |                    |     |     |                     |      |      |                  |                        |
| 2  |  |                    |     |     |                     |      |      |                  |                        |
| 3  |  |                    |     |     |                     |      |      |                  |                        |
| 4  |  |                    |     |     |                     |      |      |                  |                        |
| 5  |  | 1997-2001          | 289 | 108 | 2.69 (2.39–3.00)    | 1.22 | 0.77 | 0.57 (0.49–0.66) | 0.50 (0.43–0.58)       |
| 6  |  |                    |     |     |                     |      |      |                  |                        |
| 7  |  |                    |     |     |                     |      |      |                  |                        |
| 8  |  | 2002-2006          | 215 | 89  | 2.43 (2.12–2.76)    | 0.99 | 0.59 | 0.47 (0.40–0.56) | 0.32 (0.27–0.39)       |
| 9  |  |                    |     |     |                     |      |      |                  |                        |
| 10 |  |                    |     |     |                     |      |      |                  |                        |
| 11 |  | <b>Women 25-44</b> |     |     |                     |      |      |                  |                        |
| 12 |  |                    |     |     |                     |      |      |                  |                        |
| 13 |  |                    |     |     |                     |      |      |                  |                        |
| 14 |  | 1987-1991          | 34  | 2   | 17.55 (12.15–23.94) | 2.39 | 2.26 | 1.0 (ref)        | 1.0 (ref)              |
| 15 |  |                    |     |     |                     |      |      |                  |                        |
| 16 |  |                    |     |     |                     |      |      |                  |                        |
| 17 |  | 1992-1996          | 28  | 2   | 17.99 (11.95–25.27) | 2.17 | 2.05 | 0.93 (0.56–1.55) | 0.85 (0.51–1.42)       |
| 18 |  |                    |     |     |                     |      |      |                  |                        |
| 19 |  |                    |     |     |                     |      |      |                  |                        |
| 20 |  | 1997-2001          | 10  | 2   | 6.07 (2.89–10.42)   | 0.63 | 0.52 | 0.27 (0.13–0.55) | 0.28 (0.14–0.56)       |
| 21 |  |                    |     |     |                     |      |      |                  |                        |
| 22 |  |                    |     |     |                     |      |      |                  |                        |
| 23 |  | 2002-2006          | 21  | 2   | 13.53 (8.36–19.93)  | 1.26 | 1.17 | 0.55 (0.32–0.94) | 0.47(0.27–0.83)        |
| 24 |  |                    |     |     |                     |      |      |                  |                        |
| 25 |  |                    |     |     |                     |      |      |                  |                        |
| 26 |  | <b>Women 45-54</b> |     |     |                     |      |      |                  |                        |
| 27 |  |                    |     |     |                     |      |      |                  |                        |
| 28 |  |                    |     |     |                     |      |      |                  |                        |
| 29 |  | 1987-1991          | 101 | 15  | 6.90 (5.62–8.31)    | 2.25 | 1.93 | 1.0 (ref)        | 1.0 (ref) <sup>h</sup> |
| 30 |  |                    |     |     |                     |      |      |                  |                        |
| 31 |  |                    |     |     |                     |      |      |                  |                        |
| 32 |  | 1992-1996          | 76  | 16  | 4.63 (3.65–5.73)    | 1.45 | 1.14 | 0.64 (0.48–0.87) | 0.56 (0.42–0.76)       |
| 33 |  |                    |     |     |                     |      |      |                  |                        |
| 34 |  |                    |     |     |                     |      |      |                  |                        |
| 35 |  | 1997-2001          | 68  | 19  | 3.58 (2.78–4.48)    | 1.08 | 0.78 | 0.49 (0.36–0.66) | 0.44 (0.32–0.60)       |
| 36 |  |                    |     |     |                     |      |      |                  |                        |
| 37 |  |                    |     |     |                     |      |      |                  |                        |
| 38 |  | 2002-2006          | 102 | 16  | 6.42 (5.24–7.73)    | 1.72 | 1.45 | 0.77 (0.59–1.02) | 0.53 (0.39–0.71)       |
| 39 |  |                    |     |     |                     |      |      |                  |                        |
| 40 |  |                    |     |     |                     |      |      |                  |                        |
| 41 |  |                    |     |     |                     |      |      |                  |                        |
| 42 |  |                    |     |     |                     |      |      |                  |                        |
| 43 |  |                    |     |     |                     |      |      |                  |                        |
| 44 |  |                    |     |     |                     |      |      |                  |                        |
| 45 |  |                    |     |     |                     |      |      |                  |                        |
| 46 |  |                    |     |     |                     |      |      |                  |                        |
| 47 |  |                    |     |     |                     |      |      |                  |                        |
| 48 |  |                    |     |     |                     |      |      |                  |                        |
| 49 |  |                    |     |     |                     |      |      |                  |                        |

1  
2  
3  
4  
5 <sup>a</sup>Observed number of deaths in the study population, <sup>b</sup>Expected number of deaths in the general population, <sup>c</sup>*Absolute risk per 100 person-years*,  
6  
7 <sup>d</sup>*Absolute excess risk per 100 person-years*, <sup>e</sup> Age adjusted, <sup>f</sup> Multiadjusted for age, diabetes, hypertension, valvular, congenital heart disease,  
8  
9 stroke, chronic respiratory disease, malignancy and renal failure. Adjusted for changes and interaction over time, malignancy (<sup>g</sup>), chronic  
10  
11 respiratory disease (<sup>h</sup>).  
12  
13 AMI, acute myocardial infarction; SMR, standardized mortality ratio; AR, absolute risk; AER, absolute excess risk; HR, hazard ratio; CI,  
14  
15 confidence interval  
16  
17  
18  
19  
20  
21  
22  
23  
24  
25  
26  
27  
28  
29  
30  
31  
32  
33  
34  
35  
36  
37  
38  
39  
40  
41  
42  
43  
44  
45  
46  
47  
48  
49

Table 3 shows causes of death for the 2,076 deaths that occurred within 4 years in this cohort. In 1987–1991, 74.8% of all deaths within 4 years were due to CVD (78.6% for men and 58.5% for women) with a majority to IHD. However, during the last period (2002–2006), only 48.4% of all deaths were due to CVD (55.4% for men and, notably, only 34.1% for women)

Table 3: Cause of death by period for 2,076 deaths within 4 years among men and women aged <55 years with a first AMI during 1987–2006

| Cause of death          | Total<br>n (%) | Men<br>n (%) | Women<br>n (%) | p-value |
|-------------------------|----------------|--------------|----------------|---------|
| <b>1987-1991</b>        | 713            | 578 (81.1)   | 135 (18.9)     |         |
| <b>CVD</b>              | 533(74.8)      | 454(78.6)    | 79 (58.5)      | <.0001  |
| <b>IHD</b>              | 481 (67.5)     | 405 (70.1)   | 76 (56.3)      | 0.0021  |
| <b>Stroke</b>           | 18 (2.52)      | 16(2.77)     | 2 (1.48)       | 0.3909  |
| <b>All other causes</b> | 180 (25.3)     | 124 (21.5)   | 56 (41.5)      | <.0001  |
| <b>Malignancies</b>     | 55 (7.71)      | 39 (6.75)    | 16 (11.9)      | 0.0454  |
| <b>1992-1996</b>        | 564            | 460 (81.6)   | 104 (18.4)     |         |
| <b>CVD</b>              | 369 (65.4)     | 318 (69.1)   | 51 (49.0)      | <.0001  |
| <b>IHD</b>              | 337 (59.8)     | 295 (64.1)   | 42 (40.4)      | <.0001  |
| <b>Stroke</b>           | 6 (1.06)       | 5 (1.09)     | 1 (0.96)       | 0.9104  |
| <b>All other causes</b> | 195 (34.6)     | 142 (30.9)   | 53 (51.0)      | <.0001  |
| <b>Malignancies</b>     | 79 (14.01)     | 57 (12.4)    | 22 (21.2)      | 0.0201  |
| <b>1997-2001</b>        | 425            | 347 (81.7)   | 78 (18.4)      |         |
| <b>CVD</b>              | 242 (56.9)     | 205 (59.1)   | 37 (47.4)      | 0.0606  |
| <b>IHD</b>              | 216 (50.8)     | 182 (52.5)   | 34 (43.6)      | 0.1573  |

|       |                         |            |            |            |         |
|-------|-------------------------|------------|------------|------------|---------|
|       | <b>Stroke</b>           | 5 (1.18)   | 3 (0.86)   | 2 (2.56)   | 0.2084  |
|       | <b>All other causes</b> | 183 (43.1) | 142 (40.9) | 41 (52.6)  | 0.0606  |
|       | <b>Malignancies</b>     | 63 (14.8)  | 52(15.0)   | 11 (14.1)  | 0.8428  |
| <hr/> |                         |            |            |            |         |
|       | <b>2002-2006</b>        | 374        | 251 (67.1) | 123 (32.9) |         |
|       | <b>CVD</b>              | 181 (48.4) | 139 (55.4) | 42 (34.1)  | 0.0001  |
|       | <b>IHD</b>              | 145 (38.8) | 116 (46.2) | 29 (23.6)  | <0.0001 |
|       | <b>Stroke</b>           | 12 (3.21)  | 7 (2.79)   | 5 (4.07)   | 0.5106  |
|       | <b>All other causes</b> | 193 (51.6) | 112 (44.6) | 81(65.9)   | 0.00001 |
|       | <b>Malignancies</b>     | 60 (16.0)  | 28 (11.2)  | 32 (26.0)  | 0.0002  |

AMI, acute myocardial infarction; IHD, ischaemic heart disease; CVD, cardiovascular disease

## DISCUSSION

The present study showed that young male survivors of AMI have low absolute long-term mortality rates; however, these rates remain between 2- and 4-fold those of the general population. After a favourable development in younger women until 2001, when new criteria for AMI were adopted and troponins became standard, women had higher absolute mortality than men in the last period and showed a dramatically higher risk of death than healthy women. However, fewer than half of all deaths in women were due to CVD in the last period.

Few studies have specifically investigated long-term outcomes in young patients with AMI.

One Swedish study based on the Register of Information and Knowledge about Swedish Heart Intensive Care Admissions (RIKS-HIA)<sup>21</sup> investigated all consecutive patients younger than 46 years treated for ST-elevation myocardial infarction (STEMI) in Sweden, 1995–2006 (1,748 men, 384 women). Long-term annual mortality was around 1% with no difference

1  
2  
3 between men and women, similar to our study. Accordingly, in absolute terms and consistent  
4 with prior publications from our group,<sup>1</sup> annual mortality rates in AMI survivors younger than  
5 55 years are estimated at about 1%. This is in contrast to older patients in Sweden, among  
6 whom annual mortality rates are about 6% for those aged 65–74 years and more than 12%  
7 among patients aged 75–84 years).<sup>1</sup> The current low absolute mortality figures are a vast  
8 improvement on prior estimates. In a retrospective analysis of 23 published studies from the  
9 prethrombolytic era, the annual death rate after the first year in patients with a first AMI was  
10 5% regardless of age or gender.<sup>22</sup> In the late 1980s, the annual mortality for patients younger  
11 than 55 years was about 2%.<sup>1</sup>

12  
13  
14  
15  
16  
17  
18  
19  
20  
21  
22  
23  
24  
25 There are several reasons for the observed decrease in mortality in younger patients with  
26 AMI. First, several pharmacological and coronary interventions were developed and  
27 implemented during the study period. Nauta et al 2013 showed that patient <55 received  
28 evidence-based medical care and reperfusion to a greater extent than elderly patients.<sup>12</sup>  
29  
30  
31  
32  
33  
34 Second, some of the decrease is likely due to changes in diagnostic criteria during the study  
35 period, as well as more sensitive methods.<sup>17,23</sup> This may imply that less severe AMIs are  
36 detected, with improved survival, but less specificity, as evidenced by increased comorbidities  
37 over time and a higher proportion of non-CVD deaths in the last period. Third, there have  
38 been changes in clinical presentation, with less severe infarctions,<sup>24,25</sup> and fewer STEMIs.<sup>26</sup>  
39  
40  
41  
42  
43  
44  
45  
46  
47  
48  
49  
50  
51  
52  
53  
54  
55  
56  
57  
58  
59  
60  
Factors that affect the risk of developing STEMI rather than non-STEMI include smoking<sup>26</sup>  
and cardioprotective medications that lower the risk.<sup>27</sup> Declining smoking rates and more  
medications used in primary prevention could thus have contributed to milder infarctions and  
better survival. Comorbidities increased during the study period. However, this can probably  
*at least partly* be derived to improvements in clinical reporting *due to financial incitements*.<sup>13</sup>



1  
2  
3 The striking increase in hypertension can also probably be attributed to changes in criteria and  
4  
5 guidelines management by the WHO.<sup>28</sup>  
6  
7

8  
9  
10 There was a continuous decrease in case fatality among men; however, rates in women did  
11  
12 not follow the same pattern as in men. Mortality in women decreased until the third period  
13  
14 and then increased during the fourth period *to nearly* the same level as in the second period.  
15  
16 This may have been due to chance because the numbers were limited. However, it could also  
17  
18 reflect differences in diagnostics. With increasing use of troponins, the rate of detection has  
19  
20 increased, and this effect could be stronger for women than for men. In a study that  
21  
22 simultaneously measured CK-MB and troponin,<sup>29</sup> a 64% and 95% increase in the AMI rate  
23  
24 among men and women, respectively, was observed when using troponins. Accordingly, the  
25  
26 increasing mortality among women hospitalized in 2002–2006 could be due to the capture of  
27  
28 other and more complicated types of myocardial damage because an increase in troponin  
29  
30 levels is also seen in other conditions.<sup>30</sup> Even so, comorbidities, although increasing over  
31  
32 time, were still low in the most recent period. *Since the most marked change between the third  
33  
34 and the fourth period of our study was the change from CK-MB to troponins as the  
35  
36 predominant marker for myocardial damage, we speculate that the additional AMIs captured  
37  
38 by this more sensitive method are clinically different, not only in being smaller but also to an  
39  
40 unknown extent reflecting myocardial damage not due to atherosclerotic disease.  
41  
42 Circumstantial evidence for this might be derived from the increasing and much higher  
43  
44 proportion of non-CVD deaths, as well as more comorbidities, in women compared to men  
45  
46 over the study period. In the present study the results showed an increased rate of survivors  
47  
48 but a decreasing trend in death in CVD among young women. These results strengthen that  
49  
50 the increased all-cause mortality is likely a result of a combination between the use of  
51  
52 troponin and increasing comorbidities.  
53  
54  
55  
56  
57  
58  
59  
60*

1  
2  
3  
4  
5 Few studies have compared mortality rates in young patients with AMI with those in the  
6 general population. A record linkage of hospital and mortality data identified 387,452  
7 individuals in England, hospitalized with a main diagnosis of AMI in 2004–2010 and who  
8 survived at least 30 days.<sup>7</sup> Long-term risk of death of any cause among survivors of a first  
9 AMI was twice that in the English general population of equivalent age, highest among  
10 younger patients aged 55–64 years (about 2- to 3-fold for men and women, respectively), and  
11 approached the mortality rate of the general population for those aged 85 years or more.

12  
13  
14 *Estimates for individuals younger than 55 years were not stated in the study by Smolina, et*  
15 *al., but we have since been provided with information that mortality ratios were 2.6 for men*  
16 *and 5.6 for women aged 30-54 years after 4 years, which is more or less comparable to our*  
17 *findings (Smolina K, personal communication).* For the period corresponding to that in the  
18 study by Smolina et al.<sup>7</sup> we found mortality ratios of 4.3 and 2.4 for men aged 25–44 and 45–  
19 54 years, respectively. For women aged 25–44 years, the estimated mortality ratio was 13.5,  
20 but this was based on very few cases (about four deaths per year). The estimate of 6.4 for  
21 women aged 45–54 years should be more reliable. It should be noted that women in the  
22 general population in this age range have very low mortality rates, which partially explains  
23 the high SMRs in women.

24  
25  
26  
27  
28  
29  
30  
31  
32  
33  
34  
35  
36  
37  
38  
39  
40  
41  
42  
43  
44  
45 The main limitation in the present study is the reliance on administrative registers with no  
46 details of *changes in several* characteristics, such as biomarkers, electrocardiographic  
47 findings, smoking, medication, hyperlipidemia, family history, *ethnicity and socioeconomic*  
48 *status* and a lack of other clinical information, notably hospital treatment and clinical  
49 presentation. Also, we were unable to apply uniform criteria for diagnosis over time. *This*  
50 *limits considerably the interpretation that can be made, however, the findings should be*  
51  
52  
53  
54  
55  
56  
57  
58  
59  
60

1  
2  
3 applicable to current patients with AMI in an industrialized modern country. The quality of  
4  
5 the data is obviously of fundamental importance, but validation studies of the IPR indicate  
6  
7 reasonable accuracy.<sup>13,14</sup> Incorrect death certificates could lead to uncertainty with respect to  
8  
9 attributing cause of death<sup>15</sup>, but IHD diagnoses has been estimated to be correct in 87% *for*  
10  
11 *ischemic heart disease* although the data from this study were collected two decades ago.<sup>16</sup>  
12  
13 *The causes of death are also considered to be more reliable for the younger population than*  
14  
15 *for the elderly population.*<sup>15</sup>  
16  
17  
18  
19

20  
21 The strengths of the study include nationwide coverage with virtually no loss to follow-up and  
22  
23 the large sample size. Given the low mortality in absolute terms, larger populations are  
24  
25 needed, particularly for women, because they constitute less than 20% of the AMI population  
26  
27 younger than 55 years.  
28  
29

## 30 31 32 **Conclusions**

33  
34  
35 These data extend and update what is currently known about sex-specific absolute and relative  
36  
37 survival in patients with AMI younger than 55 years, with a large population of more than  
38  
39 35,000 cases during a 20-year period. Among patients surviving for 28 days after AMI, the  
40  
41 annual mortality rates are now comparatively low at approximately 1%. Given the much  
42  
43 lower mortality in this age group in the general population, young survivors of AMI,  
44  
45 particularly women, remain at a much higher risk of death, much of this, however, due to non-  
46  
47 CVD causes. Accordingly, while mortality is low in absolute terms, younger women with  
48  
49 AMI lose the survival advantage women normally have over men. Additional strategies to  
50  
51 bring mortality closer to that which would be expected for this age group are needed, in  
52  
53 particular for women.  
54  
55  
56  
57  
58  
59  
60

### Contributors

Study concept, design: SN, AR, LB, JB, KWG. Analysis and interpretation of data: SN, TZS, AR, LB, JB, KWG. Drafting and revised the manuscript: SN, LB, JB, KWG, TZS, KF, SM, AR. Critical revision of the final version of the manuscript: all authors. SN, LB, JB, KWG, TZS, KF, SM, AR. Guarantor: AR

### Funding

This work was supported by the Swedish Research Council [grant number VR 521-2010-2984]; the Swedish Heart-Lung Foundation [grant number 2012-0325]; and the Swedish Council for Working Life and Social Research [grant number Epilife 2006-1506], the VGR region and the Swedish state under the ALF-LUA agreement.

### Competing interests:

None declared.

### Ethical approval

All personal identifiers were removed and replaced with a sequential number in the final data set. The protocol was approved by the regional Ethics Board of Gothenburg.

### Provenance and peer review

Not commissioned; externally peer reviewed.

### Data sharing statement

No additional data are available.

## REFERENCES

1. Dudas K, Lappas G, Rosengren A. Long-term prognosis after hospital admission for acute myocardial infarction from 1987 to 2006. *Int J Cardiol* 2012;**155**:400-405.
2. Langorgen J, Iglund J, Vollset SE, *et al.* Short-term and long-term case fatality in 11 878 patients hospitalized with a first acute myocardial infarction, 1979-2001: the Western Norway cardiovascular registry. *Eur J Cardiovasc Prev Rehabil* 2009;**16**:621-627.
3. Hardoon SL, Whincup PH, Petersen I, *et al.* Trends in longer-term survival following an acute myocardial infarction and prescribing of evidenced-based medications in primary care in the UK from 1991: a longitudinal population-based study. *J Epidemiol Community Health* 2011;**65**:770-774.
4. Rayner M, Allender S, Scarborough P. Cardiovascular disease in Europe. *Eur J Cardiovasc Prev Rehabil* 2009;**16 Suppl 2**:S43-S47.
5. Nichols MTN, Scarborough P, Luengo-Fernandez R, *et al.* *European Cardiovascular Disease Statistics 2012*. European Heart Network, Brussels, European Society of Cardiology, Sophia Antipolis; 2012.
6. Fagring AJ, Lappas G, Kjellgren KI, *et al.* Twenty-year trends in incidence and 1-year mortality in Swedish patients hospitalised with non-AMI chest pain. Data from 1987-2006 from the Swedish hospital and death registries. *Heart* 2010;**96**:1043-1049.
7. Smolina K, Wright FL, Rayner M, *et al.* Long-term survival and recurrence after acute myocardial infarction in England, 2004 to 2010. *Circ Cardiovasc Qual Outcomes* 2012;**5**:532-540.
8. Gale CP, Cattle B, Woolston A, *et al.* Resolving inequalities in care? Reduced mortality in the elderly after acute coronary syndromes. The Myocardial Ischaemia National Audit Project 2003-2010. *Eur Heart J* 2012;**33**:630-639.

- 1  
2  
3 9. Rosengren A, Spetz CL, Koster M, *et al.* Sex differences in survival after myocardial  
4 infarction in Sweden; data from the Swedish National Acute Myocardial Infarction  
5 Register. *Eur Heart J* 2001;**22**:314-322.  
6  
7
- 8  
9  
10 10. Vaccarino V, Krumholz HM, Yarzebski J, *et al.* Sex differences in 2-year mortality  
11 after hospital discharge for myocardial infarction. *Ann Intern Med* 2001;**134**:173-181.  
12
- 13  
14 11. Nauta ST, Deckers JW, van Domburg RT, *et al.* Sex-related trends in mortality in  
15 hospitalized men and women after myocardial infarction between 1985 and 2008:  
16 equal benefit for women and men. *Circulation* 2012;**126**:2184-2189.  
17
- 18  
19  
20 12. Nauta ST, Decker JW, Akkerhuis KM, *et al.* Age-dependent care and long-term (20  
21 year) mortality of 14,434 myocardial infarction patients: Changes from 1985 to 2008.  
22  
23  
24  
25  
26  
27  
28  
29  
30  
31  
32  
33  
34  
35  
36  
37  
38  
39  
40  
41  
42  
43  
44  
45  
46  
47  
48  
49  
50  
51  
52  
53  
54  
55  
56  
57  
58  
59  
60  
17. Alpert JS, Thygesen K, Antman E, *et al.* Myocardial infarction redefined--a consensus  
document of The Joint European Society of Cardiology/American College of

- 1  
2  
3 Cardiology Committee for the redefinition of myocardial infarction. *J Am Coll*  
4  
5 *Cardiol* 2000;**36**:959-969.  
6  
7 18. Tunstall-Pedoe H, Kuulasmaa K, Amouyel P, *et al*. Myocardial infarction and  
8  
9 coronary deaths in the World Health Organization MONICA Project. Registration  
10  
11 procedures, event rates, and case-fatality rates in 38 populations from 21 countries in  
12  
13 four continents. *Circulation* 1994;**90**:583-612.  
14  
15  
16 19. Cox DR. Regression models and life-tables. *J R Stat Soc Series B Stat Methodol*  
17  
18 1972;**34**:187-220.  
19  
20  
21 20. Allison PD. *Survival Analysis Using SAS: A Practical Guide*. Cary, NC: SAS  
22  
23 Institute; 2010.  
24  
25 21. Lawesson SS, Stenestrand U, Lagerqvist B, *et al*. Gender perspective on risk factors,  
26  
27 coronary lesions and long-term outcome in young patients with ST-elevation  
28  
29 myocardial infarction. *Heart* 2010;**96**:453-459.  
30  
31  
32 22. Law MR, Watt HC, Wald NJ. The underlying risk of death after myocardial infarction  
33  
34 in the absence of treatment. *Arch Intern Med* 2002;**162**:2405-2410.  
35  
36  
37 23. Parikh NI, Gona P, Larson MG, *et al*. Long-term trends in myocardial infarction  
38  
39 incidence and case fatality in the National Heart, Lung, and Blood Institute's  
40  
41 Framingham Heart study. *Circulation* 2009;**119**:1203-1210.  
42  
43  
44 24. Myerson M, Coady S, Taylor H, *et al*. Declining severity of myocardial infarction  
45  
46 from 1987 to 2002: the Atherosclerosis Risk in Communities (ARIC) Study.  
47  
48 *Circulation* 2009;**119**:503-514.  
49  
50 25. Goff DC Jr, Howard G, Wang CH, *et al*. Trends in severity of hospitalized myocardial  
51  
52 infarction: the atherosclerosis risk in communities (ARIC) study, 1987-1994. *Am*  
53  
54 *Heart J* 2000;**139**:874-880.  
55  
56  
57  
58  
59  
60

- 1  
2  
3  
4  
5  
6  
7  
8  
9  
10  
11  
12  
13  
14  
15  
16  
17  
18  
19  
20  
21  
22  
23  
24  
25  
26  
27  
28  
29  
30  
31  
32  
33  
34  
35  
36  
37  
38  
39  
40  
41  
42  
43  
44  
45  
46  
47  
48  
49  
50  
51  
52  
53  
54  
55  
56  
57  
58  
59  
60
26. Bjorck L, Rosengren A, Wallentin L, *et al.* Smoking in relation to ST-segment elevation acute myocardial infarction: findings from the Register of Information and Knowledge about Swedish Heart Intensive Care Admissions. *Heart* 2009;**95**:1006-1011.
27. Bjorck L, Wallentin L, Stenestrand U, *et al.* Medication in relation to ST-segment elevation myocardial infarction in patients with a first myocardial infarction: Swedish Register of Information and Knowledge about Swedish Heart Intensive Care Admissions (RIKS-HIA). *Arch Intern Med* 2010;**170**:1375-1381.
28. *World Health Organization, international Society of hypertension Writing Group. 2003 World Health Organization (WHO)/International Society of Hypertension (ISH) statement on management of hypertension. J Hypertens* 2003;**21**:1983-1992
29. *Luepker RV, Duval S, Jacobs DR Jr, et al. The effect of changing diagnostic algorithms on acute myocardial infarction rates. Ann Epidemiol* 2011;**21**:824-829.
30. Meier MA, Al-Badr WH, Cooper JV, *et al.* The new definition of myocardial infarction: diagnostic and prognostic implications in patients with acute coronary syndromes. *Arch Intern Med* 2002;**162**:1585-1589.



**FIGURE LEGENDS**

*Figure 1 Annual rate per 100.000 population in men and women aged 25-54 years surviving a first AMI for at least 28 days.*

**Figure 2** Four-year trend in survival probability by period and time among men (n 30 047) aged 25–54 years with a first AMI

**Figure 3** Four-year trend in survival probability by period and time among women (n 7 229) aged 25–54 years with a first AMI

1  
2  
3  
4  
5  
6  
7  
8  
9  
10  
11  
12  
13  
14  
15  
16  
17  
18  
19  
20  
21  
22  
23  
24  
25  
26  
27  
28  
29  
30  
31  
32  
33  
34  
35  
36  
37  
38  
39  
40  
41  
42  
43  
44  
45  
46  
47  
48  
49  
50  
51  
52  
53  
54  
55  
56  
57  
58  
59  
60

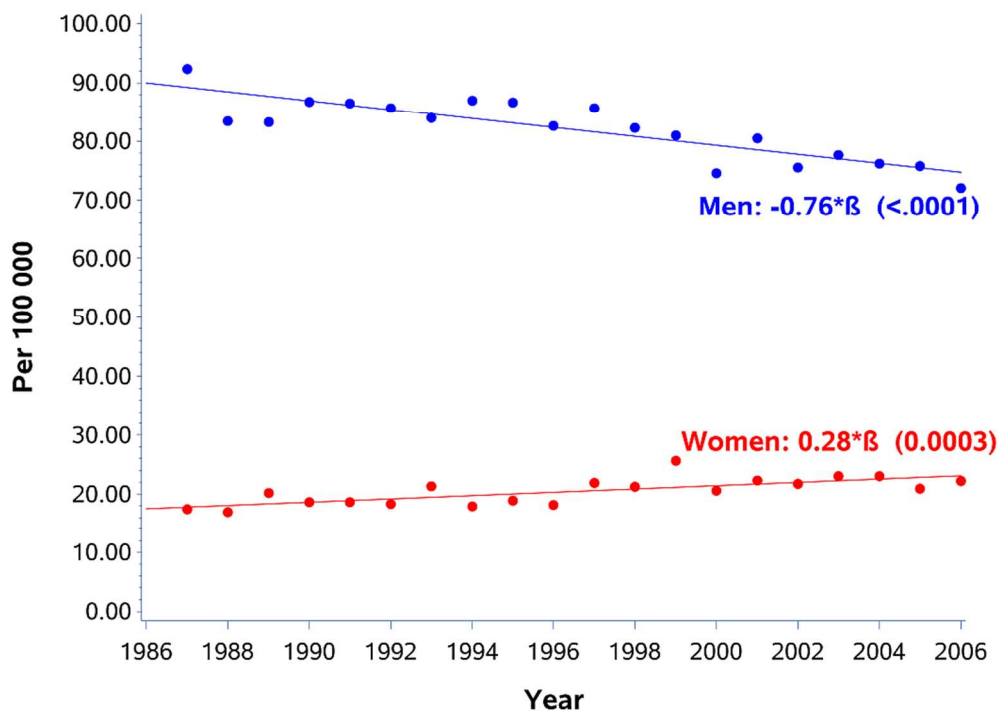

Figure 1 Annual rate per 100.000 population in men and women aged 25-54 years surviving a first AMI for at least 28 days.  
90x64mm (300 x 300 DPI)

Review only

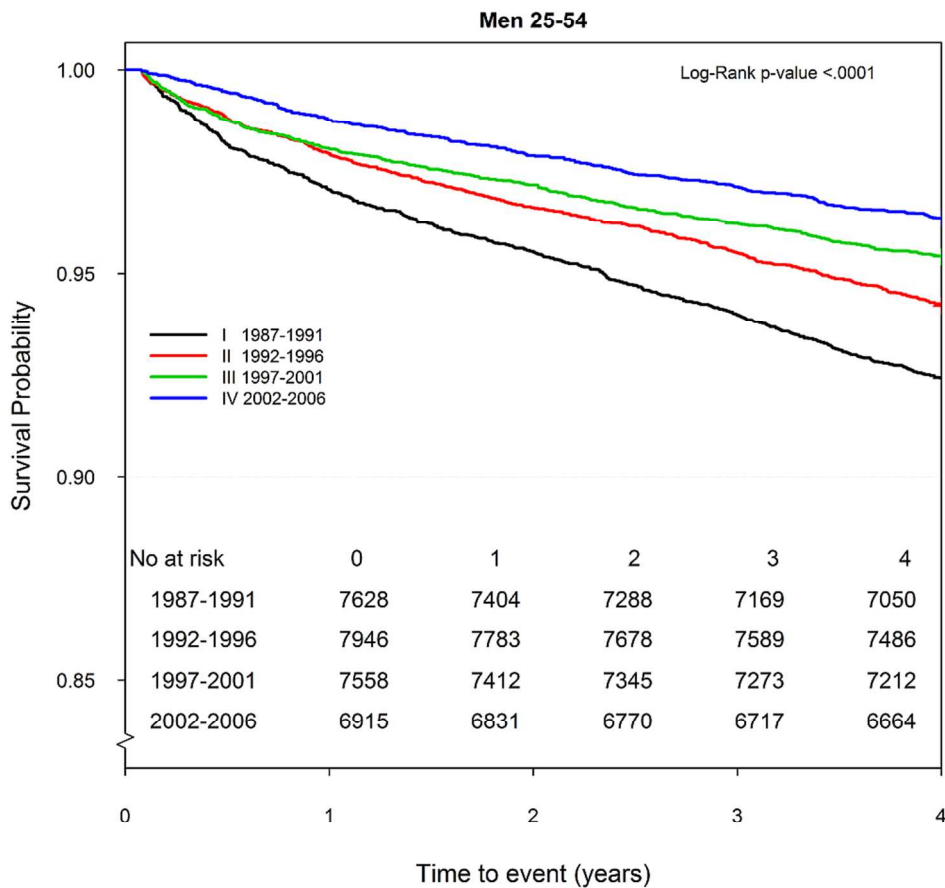

Figure 2 Four-year trend in survival probability by period and time among men (n 30 047) aged 25–54 years with a first AMI  
90x90mm (300 x 300 DPI)

1  
2  
3  
4  
5  
6  
7  
8  
9  
10  
11  
12  
13  
14  
15  
16  
17  
18  
19  
20  
21  
22  
23  
24  
25  
26  
27  
28  
29  
30  
31  
32  
33  
34  
35  
36  
37  
38  
39  
40  
41  
42  
43  
44  
45  
46  
47  
48  
49  
50  
51  
52  
53  
54  
55  
56  
57  
58  
59  
60

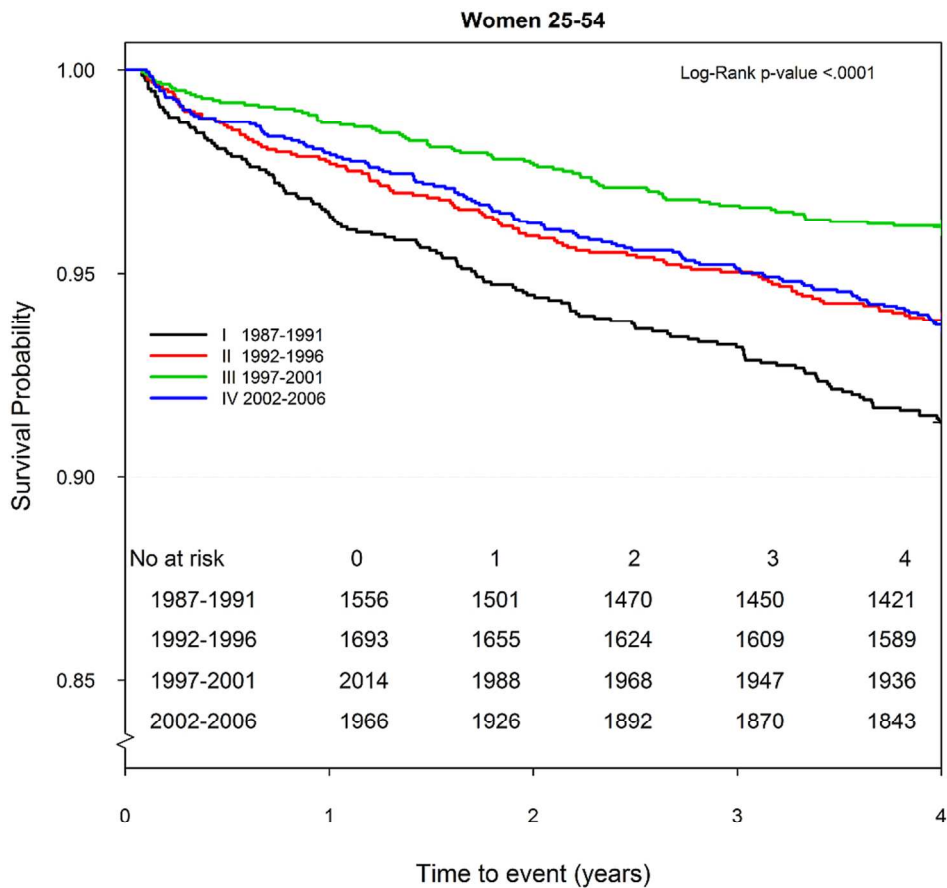

Figure 3 Four-year trend in survival probability by period and time among women (n 7 229) aged 25–54 years with a first AMI  
90x90mm (300 x 300 DPI)

Supplemental Table 1: Baseline characteristics by period among 37,276 men and women with a first AMI, 1987–2006

|                                   |       | 1987-1991   | 1992-1996   | 1997-2001   | 2002-2006   | p for trend |
|-----------------------------------|-------|-------------|-------------|-------------|-------------|-------------|
| <b>Number of cases</b>            | Men   | 7628 (83.1) | 7946 (82.4) | 7558 (79.0) | 6915 (77.9) |             |
| <b>Number of cases</b>            | Women | 1556 (16.9) | 1693 (17.6) | 2014 (21.0) | 1966 (22.1) |             |
| <b>Diabetes</b>                   | Men   | 542 (7.11)  | 728 (9.16)  | 814 (10.8)  | 933 (13.5)  | <.0001      |
|                                   | Women | 200 (12.9)  | 244 (14.4)  | 276 (13.7)  | 327 (16.6)  | 0.0043      |
| <b>Hypertension</b>               | Men   | 451 (5.91)  | 655 (8.24)  | 807 (10.7)  | 1228 (17.8) | <.0001      |
|                                   | Women | 106 (6.81)  | 188 (11.1)  | 252 (12.5)  | 423 (21.52) | <.0001      |
| <b>Valvular disease</b>           | Men   | 35 (0.47)   | 34 (0.43)   | 53 (0.70)   | 89 (1.29)   | <.0001      |
|                                   | Women | 11 (0.71)   | 16 (0.95)   | 17 (0.84)   | 32 (1.63)   | 0.0125      |
| <b>Congenital heart disease</b>   | Men   | 7 (0.09)    | 1 (0.01)    | 6 (0.08)    | 9 (0.13)    | 0.2212      |
|                                   | Women | 1 (0.06)    | 3 (0.18)    | 4 (0.20)    | 5 (0.25)    | 0.1981      |
| <b>Stroke</b>                     | Men   | 36 (0.47)   | 52 (0.65)   | 40 (0.53)   | 174 (2.52)  | <.0001      |
|                                   | Women | 10 (0.64)   | 18 (1.06)   | 21 (1.04)   | 61 (3.10)   | <.0001      |
| <b>Chronic lower resp disease</b> | Men   | 61 (0.80)   | 77 (0.97)   | 86 (1.14)   | 144 (2.08)  | <.0001      |
|                                   | Women | 26 (1.67)   | 41 (2.42)   | 46 (2.28)   | 76 (3.87)   | 0.0001      |

1  
2  
3  
4  
5  
6  
7  
8  
9  
10  
11  
12  
13  
14  
15  
16  
17  
18  
19  
20  
21  
22  
23  
24  
25  
26  
27  
28  
29  
30  
31  
32  
33  
34  
35  
36  
37  
38  
39  
40  
41  
42  
43  
44  
45  
46  
47  
48  
49

|                      |       |           |           |           |            |        |
|----------------------|-------|-----------|-----------|-----------|------------|--------|
| <b>Malignancy</b>    | Men   | 11 (0.14) | 24 (0.30) | 55 (0.73) | 165 (2.39) | <.0001 |
|                      | Women | 10 (0.64) | 17 (1.00) | 14 (0.70) | 58 (2.95)  | <.0001 |
| <b>Renal failure</b> | Men   | 7 (0.09)  | 25 (0.31) | 47 (0.62) | 85 (1.23)  | <.0001 |
|                      | Women | 3 (0.19)  | 15 (0.89) | 13 (0.65) | 35 (1.78)  | <.0001 |

---

For peer review only

## STROBE Statement—checklist of items that should be included in reports of observational studies

|                           | Item No | Recommendation                                                                                                                                                                                                                                                                                                                                                                                                                                                                                                                  |
|---------------------------|---------|---------------------------------------------------------------------------------------------------------------------------------------------------------------------------------------------------------------------------------------------------------------------------------------------------------------------------------------------------------------------------------------------------------------------------------------------------------------------------------------------------------------------------------|
| <b>Title and abstract</b> | 1       | (a) Indicate the study's design with a commonly used term in the title or the abstract<br><br>Title: Sex-specific trends in survival in 37,276 men and women with acute myocardial infarction before the age of 55 years in Sweden, 1987–2006.<br><br>Prospective cohort study.                                                                                                                                                                                                                                                 |
|                           |         | (b) Provide in the abstract an informative and balanced summary of what was done and what was found<br><br>Please see page 2                                                                                                                                                                                                                                                                                                                                                                                                    |
| <b>Introduction</b>       |         |                                                                                                                                                                                                                                                                                                                                                                                                                                                                                                                                 |
| Background/rationale      | 2       | Explain the scientific background and rationale for the investigation being reported<br><br>Please see page 4-5                                                                                                                                                                                                                                                                                                                                                                                                                 |
| Objectives                | 3       | State specific objectives, including any prespecified hypotheses<br><br>Please see page 5                                                                                                                                                                                                                                                                                                                                                                                                                                       |
| <b>Methods</b>            |         |                                                                                                                                                                                                                                                                                                                                                                                                                                                                                                                                 |
| Study design              | 4       | Present key elements of study design early in the paper<br><br>Please see page 5                                                                                                                                                                                                                                                                                                                                                                                                                                                |
| Setting                   | 5       | Describe the setting, locations, and relevant dates, including periods of recruitment, exposure, follow-up, and data collection<br><br>Please see page 5-6                                                                                                                                                                                                                                                                                                                                                                      |
| Participants              | 6       | (a) <i>Cohort study</i> —Give the eligibility criteria, and the sources and methods of selection of participants. Describe methods of follow-up<br><br>Please see page 5-6<br><br><i>Case-control study</i> —Give the eligibility criteria, and the sources and methods of case ascertainment and control selection. Give the rationale for the choice of cases and controls<br><br>N/A<br><br><i>Cross-sectional study</i> —Give the eligibility criteria, and the sources and methods of selection of participants<br><br>N/A |
|                           |         | (b) <i>Cohort study</i> —For matched studies, give matching criteria and number of exposed and unexposed<br><br>N/A                                                                                                                                                                                                                                                                                                                                                                                                             |

1  
2  
3  
4  
5  
6  
7

*Case-control study*—For matched studies, give matching criteria and the number of controls per case  
N/A

---

8  
9  
10  
11  
12

|           |   |                                                                                                                                                                     |
|-----------|---|---------------------------------------------------------------------------------------------------------------------------------------------------------------------|
| Variables | 7 | Clearly define all outcomes, exposures, predictors, potential confounders, and effect modifiers. Give diagnostic criteria, if applicable<br><br>Please see page 5-6 |
|-----------|---|---------------------------------------------------------------------------------------------------------------------------------------------------------------------|

---

13  
14  
15  
16  
17

|                              |    |                                                                                                                                                                                                                 |
|------------------------------|----|-----------------------------------------------------------------------------------------------------------------------------------------------------------------------------------------------------------------|
| Data sources/<br>measurement | 8* | For each variable of interest, give sources of data and details of methods of assessment (measurement). Describe comparability of assessment methods if there is more than one group<br><br>Please see page 5-6 |
|------------------------------|----|-----------------------------------------------------------------------------------------------------------------------------------------------------------------------------------------------------------------|

---

18  
19  
20  
21  
22  
23  
24

|      |   |                                                                      |
|------|---|----------------------------------------------------------------------|
| Bias | 9 | Describe any efforts to address potential sources of bias<br><br>N/A |
|------|---|----------------------------------------------------------------------|

---

25  
26  
27  
28  
29

|            |    |                                                                                                                       |
|------------|----|-----------------------------------------------------------------------------------------------------------------------|
| Study size | 10 | Explain how the study size was arrived at<br><br>N/A. All patients in Sweden in the relevant age group were included. |
|------------|----|-----------------------------------------------------------------------------------------------------------------------|

---

30  
31  
32  
33  
34  
35  
36  
37  
38  
39  
40  
41  
42  
43  
44  
45  
46  
47  
48  
49  
50  
51  
52

|                        |    |                                                                                                                                                       |
|------------------------|----|-------------------------------------------------------------------------------------------------------------------------------------------------------|
| Quantitative variables | 11 | Explain how quantitative variables were handled in the analyses. If applicable, describe which groupings were chosen and why<br><br>Please see page 6 |
|------------------------|----|-------------------------------------------------------------------------------------------------------------------------------------------------------|

---

53  
54  
55  
56  
57  
58  
59  
60

|                     |    |                                                                                                                                                                                                                                                                                                                                                                                                                                                                                                                                                                                                                                                                                                     |
|---------------------|----|-----------------------------------------------------------------------------------------------------------------------------------------------------------------------------------------------------------------------------------------------------------------------------------------------------------------------------------------------------------------------------------------------------------------------------------------------------------------------------------------------------------------------------------------------------------------------------------------------------------------------------------------------------------------------------------------------------|
| Statistical methods | 12 | (a) Describe all statistical methods, including those used to control for confounding<br><br>Please see page 7-8<br>(b) Describe any methods used to examine subgroups and interactions<br><br>Please see page 7-8<br>(c) Explain how missing data were addressed<br><br>N/A<br>(d) <i>Cohort study</i> —If applicable, explain how loss to follow-up was addressed<br><br>Loss to follow-up negligible<br><br><i>Case-control study</i> —If applicable, explain how matching of cases and controls was addressed<br>N/A<br><i>Cross-sectional study</i> —If applicable, describe analytical methods taking account of sampling strategy<br>N/A<br>(e) Describe any sensitivity analyses<br><br>N/A |
|---------------------|----|-----------------------------------------------------------------------------------------------------------------------------------------------------------------------------------------------------------------------------------------------------------------------------------------------------------------------------------------------------------------------------------------------------------------------------------------------------------------------------------------------------------------------------------------------------------------------------------------------------------------------------------------------------------------------------------------------------|

Continued on next page



---

**Results**


---

|                  |     |                                                                                                                                                                                                                                                                                                                                                                                                                                                                                                                                                                               |
|------------------|-----|-------------------------------------------------------------------------------------------------------------------------------------------------------------------------------------------------------------------------------------------------------------------------------------------------------------------------------------------------------------------------------------------------------------------------------------------------------------------------------------------------------------------------------------------------------------------------------|
| Participants     | 13* | (a) Report numbers of individuals at each stage of study—eg numbers potentially eligible, examined for eligibility, confirmed eligible, included in the study, completing follow-up, and analysed<br><br><a href="#">Please see page 5</a><br><br>(b) Give reasons for non-participation at each stage<br><br><a href="#">N/A</a><br><br>(c) Consider use of a flow diagram<br><br><a href="#">N/A</a>                                                                                                                                                                        |
| Descriptive data | 14* | (a) Give characteristics of study participants (eg demographic, clinical, social) and information on exposures and potential confounders<br><br><a href="#">Please see page 5-6</a><br><br>(b) Indicate number of participants with missing data for each variable of interest<br><br><a href="#">N/A</a><br><br>(c) <i>Cohort study</i> —Summarise follow-up time (eg, average and total amount)<br><br><a href="#">Please see page 6</a>                                                                                                                                    |
| Outcome data     | 15* | <i>Cohort study</i> —Report numbers of outcome events or summary measures over time<br><br><a href="#">Please see Table 2 and 3 , and page 15.</a><br><br><i>Case-control study</i> —Report numbers in each exposure category, or summary measures of exposure<br><br><a href="#">N/A</a><br><br><i>Cross-sectional study</i> —Report numbers of outcome events or summary measures<br><br><a href="#">N/A</a>                                                                                                                                                                |
| Main results     | 16  | (a) Give unadjusted estimates and, if applicable, confounder-adjusted estimates and their precision (eg, 95% confidence interval). Make clear which confounders were adjusted for and why they were included<br><br><a href="#">Please see Table 2 and 3, and statistical methods.</a><br><br>(b) Report category boundaries when continuous variables were categorized<br><br><a href="#">Done</a><br><br>(c) If relevant, consider translating estimates of relative risk into absolute risk for a meaningful time period<br><br><a href="#">Please see Tables 2 and 3.</a> |
| Other analyses   | 17  | Report other analyses done—eg analyses of subgroups and interactions, and sensitivity                                                                                                                                                                                                                                                                                                                                                                                                                                                                                         |

1  
2 analyses

3  
4  
5 [Please see page 15](#)

---

6 **Discussion**

7 Key results 18 Summarise key results with reference to study objectives

8  
9  
10 [Please see page 15-16](#)

11 Limitations 19 Discuss limitations of the study, taking into account sources of potential bias or imprecision.  
12 Discuss both direction and magnitude of any potential bias

13  
14 [Please see page 18-19](#)

15 Interpretation 20 Give a cautious overall interpretation of results considering objectives, limitations, multiplicity  
16 of analyses, results from similar studies, and other relevant evidence

17  
18  
19 [Please see page 15-19](#)

20 Generalisability 21 Discuss the generalisability (external validity) of the study results

21  
22  
23 [Please see page 18](#)

---

24 **Other information**

25 Funding 22 Give the source of funding and the role of the funders for the present study and, if applicable,  
26 for the original study on which the present article is based

27  
28  
29 [Please see page 19](#)

30  
31  
32 \*Give information separately for cases and controls in case-control studies and, if applicable, for exposed and  
33 unexposed groups in cohort and cross-sectional studies.

34  
35 **Note:** An Explanation and Elaboration article discusses each checklist item and gives methodological background and  
36 published examples of transparent reporting. The STROBE checklist is best used in conjunction with this article (freely  
37 available on the Web sites of PLoS Medicine at <http://www.plosmedicine.org/>, Annals of Internal Medicine at  
38 <http://www.annals.org/>, and Epidemiology at <http://www.epidem.com/>). Information on the STROBE Initiative is  
39 available at [www.strobe-statement.org](http://www.strobe-statement.org).

40  
41  
42  
43  
44  
45  
46  
47  
48  
49  
50  
51  
52  
53  
54  
55  
56  
57  
58  
59  
60
